# Supplementary material for: BeBe triple bond in Be2X4Y2 clusters (X = Li, Na and Y = Li, Na, K) and a perfect classical BeBe triple bond presented in Be2Na4K2
Source: Royal Society of Chemistry journal article supplement (doi:10.1039/c9dt03321a), 2019-01-01
Supplement: c9dt03321a1.pdf [file c9dt03321a1.pdf]

## Supporting Information

### **Be≡Be triple bond in Be<sub>2</sub>X<sub>4</sub>Y<sub>2</sub> clusters (X = Li, Na and Y = Li, Na, K) and a perfect classical Be≡Be triple bond presented in Be<sub>2</sub>Na<sub>4</sub>K<sub>2</sub>**

Xingman Liu,<sup>a</sup> Ronglin Zhong,<sup>b</sup> Min Zhang,<sup>\*a</sup> Shuixing Wu,<sup>c</sup> Yun Geng<sup>a</sup> and Zhongmin Su<sup>\*ad</sup>

<sup>a</sup> Institute of Functional Material Chemistry, Faculty of Chemistry & National & Local United Engineering Laboratory for Power Battery, Northeast Normal University, Changchun 130024 (P.R. China).

<sup>b</sup> Laboratory of Theoretical and Computational Chemistry, Institute of Theoretical Chemistry, Jilin University, Changchun 130023 (P.R. China).

<sup>c</sup> College of Chemistry & Chemical Engineering, Hainan Normal University, Haikou 571158 (P.R. China).

<sup>d</sup> School of Chemistry and Environmental Engineering, Changchun University of Science and Technology, Changchun 130024, (P.R. China).

#### **Corresponding Author**

E-mail: Prof. M. Zhang [mzhang@nenu.edu.cn](mailto:mzhang@nenu.edu.cn), Prof. Z. Su [zmsu@nenu.edu.cn](mailto:zmsu@nenu.edu.cn)

## METHOD

The initial structures were generated using CALYPSO algorithm,<sup>34</sup> and then the initial geometries were re-optimized and filtrated using B3LYP/6-31G(D) approaches. In this process, only structures without imaginary frequencies were further studied. The  $D_{4h}$ -Be<sub>2</sub>Na<sub>4</sub>K<sub>2</sub> and  $C_{2h}$ -Be<sub>2</sub>Li<sub>4</sub>K<sub>2</sub> data were calculated at the CCSD/cc-pVTZ/6-311G(d) level, where 6-311G(d) basis set is for K and cc-pVTZ basis set is for Be, Li and Na. For other clusters, their ground state structure and the corresponding electron structure analysis were all confirmed at the CCSD/cc-pVTZ level. The Born-Oppenheimer molecular dynamics were also executed to check their dynamic stability. Gibbs free energy changes of different reactions (Scheme S1) were also performed and the data clearly declare their excellent stability. Various bonding analysis strategies including AdNDP, EFL, LOL and AIM were all carried out using Multiwfn program.<sup>35</sup> The Compliance program was used to calculate the force constants FC.<sup>36,37</sup> The Laplacian, FMO and ESP analysis were performed by Gaussian 09 package.<sup>38</sup> NBO analysis was conducted with NBO program implemented in the Gaussian.

## Reference

34. Y. Wang, J. Lv, L. Zhu, and Y. Ma, CALYPSO: a method for crystal structure prediction. *Comput. Phys. Commun.*, <http://www.calypso.cn> (2012).
35. T. Lu and F. Chen, Multiwfn: a multifunctional wavefunction analyzer, *J. Comput. Chem.*, 2012, **33**, 580–592.
36. K. Brandhorst, J. Grunenberg, Efficient computation of compliance matrices in redundant internal coordinates from Cartesian Hessians for nonstationary points, *J. Chem. Phys.*, 2010, **132**, 184101-184107.
37. K. Brandhorst and J. Grunenberg, How strong is it? The interpretation of force and compliance constants as bond strength descriptors, *Chem. Soc. Rev.*, 2008, **37**, 1558-1567.
38. M. J. Frisch et al., Gaussian09 (RevisionD.01), Gaussian, Inc., Wallingford, Connecticut, 2009.

## Table of Contents

SI1 The comparison of  $D_{4h}$ - $\text{Be}_2\text{X}_6$  and  $C_{2h}$ - $\text{Be}_2\text{X}_6$  (X=Li, Na) structures in **Figure S1**.

SI2-3 The detailed structural parameters of  $\text{Be}_2\text{X}_4\text{Y}_2$  in **Figure S2**.

SI4-8 The lowest-lying isomers of  $\text{Be}_2\text{X}_4\text{Y}_2$  re-optimized and filtrated at the B3LYP/6-31G(d) level after searched by CALYPSO program, together with their relative energy difference given in **Figure S3**.

SI9 The BOMD results for  $\text{Be}_2\text{X}_4\text{Y}_2$  at the B3LYP/6-31G\* level shown in **Figure S4**.

SI10-12 The ADNDP, LOL, ELF analysis for  $\text{Be}_2\text{X}_4\text{Y}_2$  shown in **Figure S5** to **Figure S9**.

SI13-14 The AIM analysis for  $\text{Be}_2\text{X}_4\text{Y}_2$  listed in **Figure S10-S11**.

SI15-17 The Laplacian electron density plots of  $\text{Be}_2\text{X}_4\text{Y}_2$  except for  $D_{4h}$ - $\text{Be}_2\text{Na}_4\text{K}_2$  and  $C_{2h}$ - $\text{Be}_2\text{Li}_6$  presented in **Figure S12** to **S14**.

SI18 The lowest frequency and corresponding Be-Be stretching vibrational modes for  $\text{Be}_2\text{X}_4\text{Y}_2$  shown in **Figure S15**.

SI19 Several potential reactions and thermodynamic values of  $\text{Be}_2\text{X}_4\text{Y}_2$  shown as in **Scheme S1**.

SI20-22 Detailed orbital component analysis results of  $\text{Be}_2\text{X}_4\text{Y}_2$  listed in **Table S1**.

SI23 The detailed structural coordinates.

S11

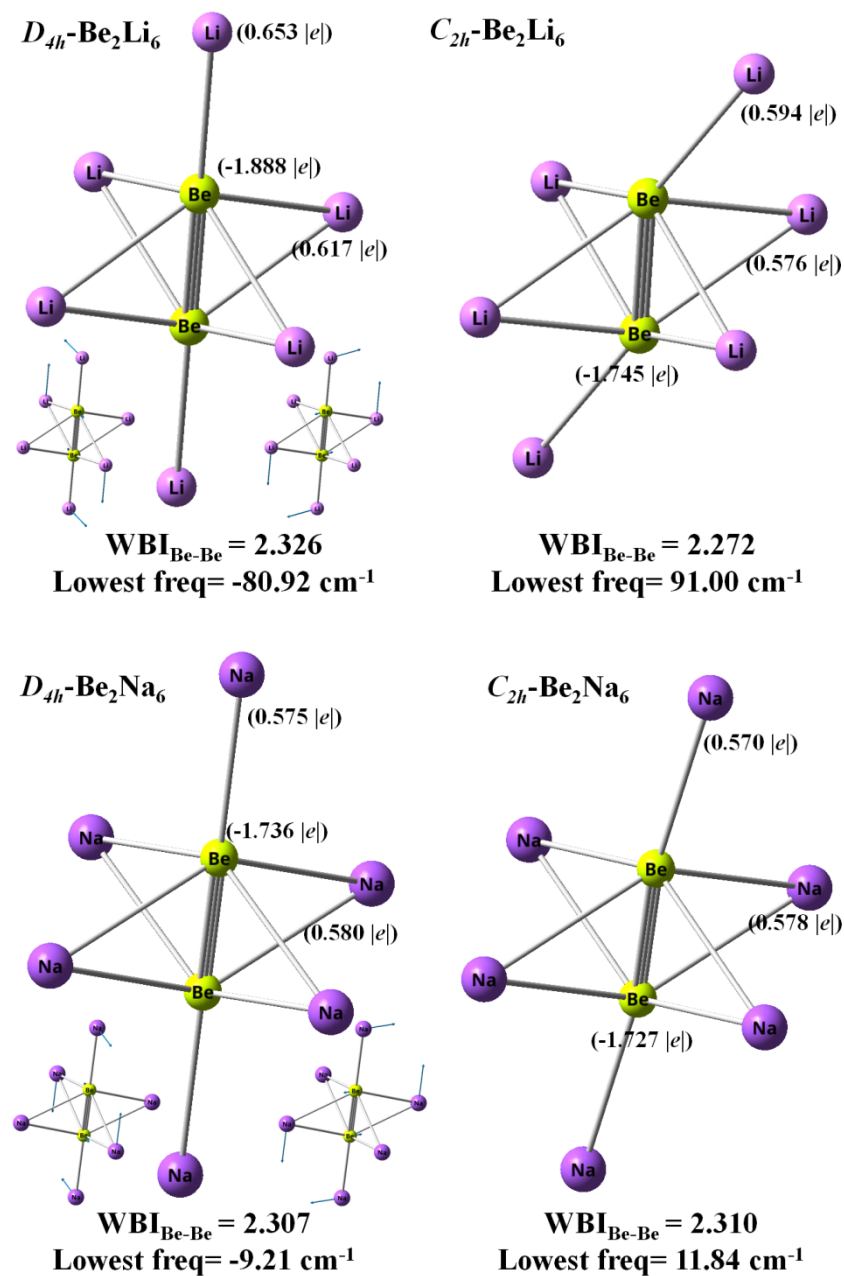

**Figure S1.** The comparison of  $D_{4h}$ -Be<sub>2</sub>X<sub>6</sub> and  $C_{2h}$ -Be<sub>2</sub>X<sub>6</sub> (X=Li, Na) structures. The values in parentheses correspond to the NPA charges. The vibration modes of degenerate lowest imaginary frequency of the  $D_{4h}$ -Be<sub>2</sub>X<sub>6</sub> structures are also given.

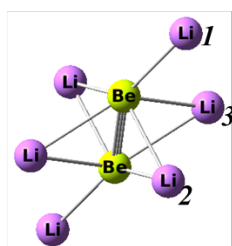 $C_{2h}$ -Be<sub>2</sub>Li<sub>6</sub>

$$\begin{aligned} \text{NPA}_{\text{Be}} &= -1.75 |e| \\ \text{NPA}_{\text{Li1}} &= 0.59 |e| \\ \text{NPA}_{\text{Li3}} &= 0.58 |e| \end{aligned}$$

$$\begin{aligned} \text{WBI}_{\text{Be-Be}} &= 2.272 \\ \text{WBI}_{\text{Li1-Be}} &= 0.427 \\ \text{WBI}_{\text{Li3-Be}} &= 0.355 \\ \text{WBI}_{\text{Li1-Li3}} &= 0.069 \end{aligned}$$

$$\begin{aligned} R_{\text{Be-Be}} &= 1.982 \text{ \AA} \\ R_{\text{Be-Li1}} &= 2.462 \text{ \AA} \\ R_{\text{Be-Li3}} &= 2.378 \text{ \AA} \\ R_{\text{Li1-Li3}} &= 3.373 \text{ \AA} \\ R_{\text{Li2-Li3}} &= 3.076 \text{ \AA} \\ \angle_{\text{Be-Be-Li1}} &= 150.14^\circ \end{aligned}$$

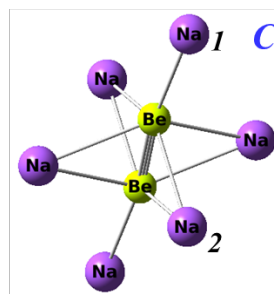 $C_{2h}$ -Be<sub>2</sub>Na<sub>6</sub>

$$\begin{aligned} \text{NPA}_{\text{Be}} &= -1.73 |e| \\ \text{NPA}_{\text{Na1}} &= 0.57 |e| \\ \text{NPA}_{\text{Na3}} &= 0.58 |e| \end{aligned}$$

$$\begin{aligned} \text{WBI}_{\text{Be-Be}} &= 2.310 \\ \text{WBI}_{\text{Na1-Be}} &= 0.449 \\ \text{WBI}_{\text{Na2-Be}} &= 0.285 \\ \text{WBI}_{\text{Na2-Na3}} &= 0.052 \\ \text{WBI}_{\text{Na1-Na3}} &= 0.060 \end{aligned}$$

$$\begin{aligned} R_{\text{Be-Be}} &= 1.982 \text{ \AA} \\ R_{\text{Be-Na1}} &= 2.719 \text{ \AA} \\ R_{\text{Be-Na2}} &= 2.798 \text{ \AA} \\ R_{\text{Na1-Na3}} &= 4.349 \text{ \AA} \\ R_{\text{Na2-Na3}} &= 3.714 \text{ \AA} \\ \angle_{\text{Be-Be-Na1}} &= 171.63^\circ \end{aligned}$$

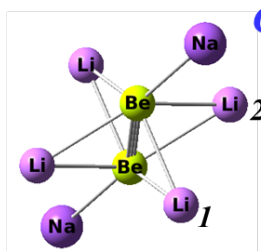 $C_{2h}$ -Be<sub>2</sub>Li<sub>4</sub>Na<sub>2</sub>

$$\begin{aligned} \text{NPA}_{\text{Be}} &= -1.75 |e| \\ \text{NPA}_{\text{Li}} &= 0.57 |e| \\ \text{NPA}_{\text{Na}} &= 0.54 |e| \end{aligned}$$

$$\begin{aligned} \text{WBI}_{\text{Be-Be}} &= 2.382 \\ \text{WBI}_{\text{Na-Be}} &= 0.428 \\ \text{WBI}_{\text{Li1-Be}} &= 0.334 \\ \text{WBI}_{\text{Li1-Na}} &= 0.085 \\ \text{WBI}_{\text{Li-Li}} &= 0.056 \end{aligned}$$

$$\begin{aligned} R_{\text{Be-Be}} &= 1.973 \text{ \AA} \\ R_{\text{Be-Na}} &= 2.754 \text{ \AA} \\ R_{\text{Be-Li2}} &= 2.406 \text{ \AA} \\ R_{\text{Na-Li2}} &= 3.676 \text{ \AA} \\ R_{\text{Li-Li}} &= 3.110 \text{ \AA} \\ \angle_{\text{Be-Be-Na}} &= 151.63^\circ \end{aligned}$$

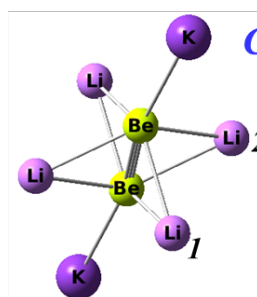 $C_{2h}$ -Be<sub>2</sub>Li<sub>4</sub>K<sub>2</sub>

$$\begin{aligned} \text{NPA}_{\text{Be}} &= -1.68 |e| \\ \text{NPA}_{\text{Li}} &= 0.51 |e| \\ \text{NPA}_{\text{K}} &= 0.66 |e| \end{aligned}$$

$$\begin{aligned} \text{WBI}_{\text{Be-Be}} &= 2.469 \\ \text{WBI}_{\text{K-Be}} &= 0.293 \\ \text{WBI}_{\text{Li1-Be}} &= 0.314 \\ \text{WBI}_{\text{Li1-K}} &= 0.072 \\ \text{WBI}_{\text{Li-Li}} &= 0.070 \end{aligned}$$

$$\begin{aligned} R_{\text{Be-Be}} &= 1.964 \text{ \AA} \\ R_{\text{Be-K}} &= 3.154 \text{ \AA} \\ R_{\text{Be-Li2}} &= 2.427 \text{ \AA} \\ R_{\text{K-Li2}} &= 4.464 \text{ \AA} \\ R_{\text{Li-Li}} &= 3.145 \text{ \AA} \\ \angle_{\text{Be-Be-K}} &= 169.33^\circ \end{aligned}$$

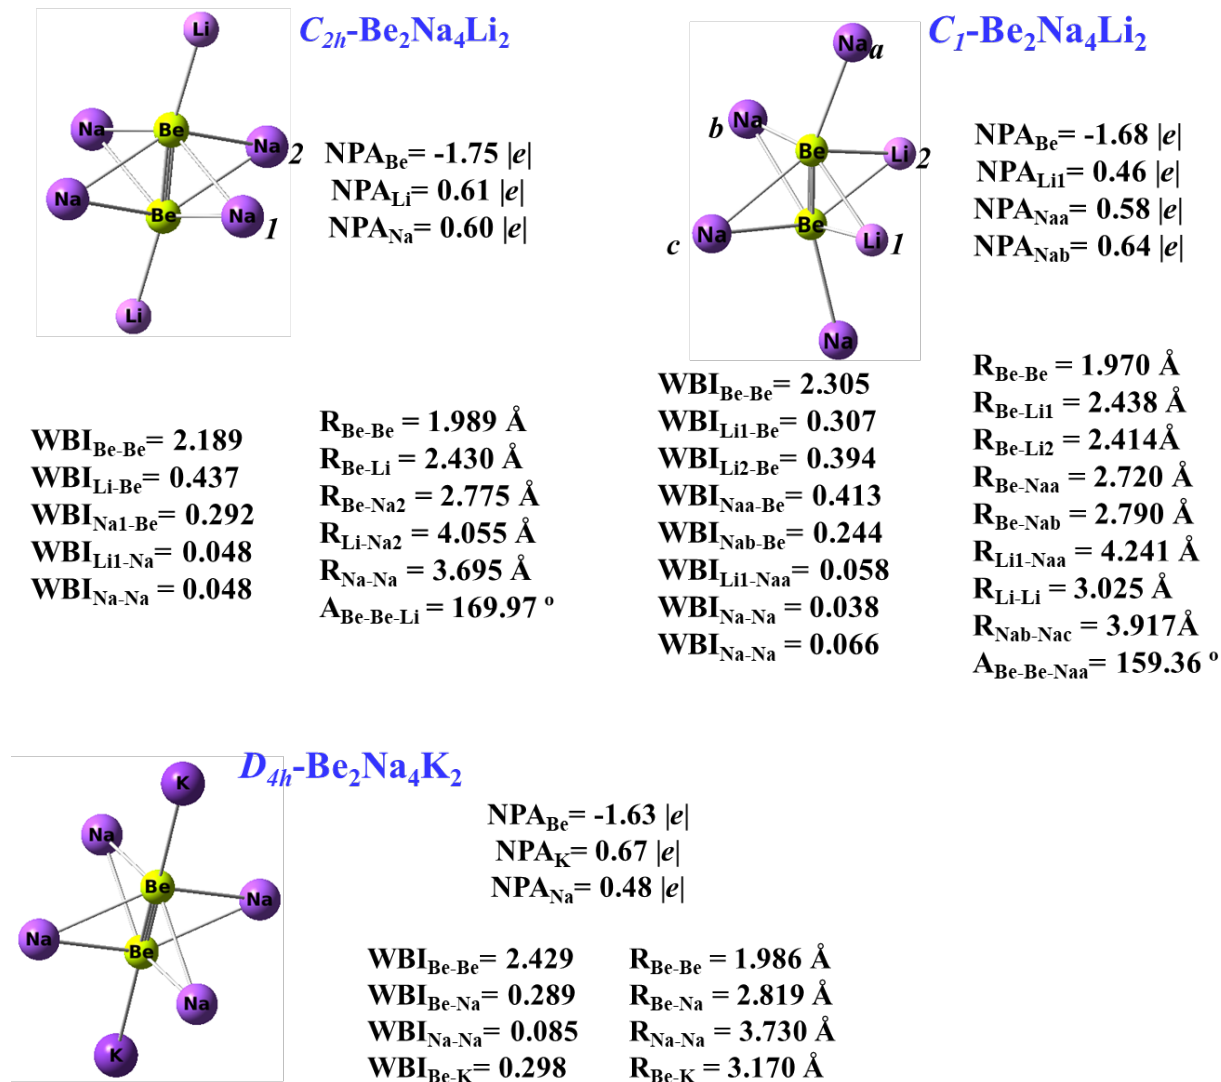

**Figure S2.** The detailed structural parameters of  $C_{2h}$ -Be<sub>2</sub>Li<sub>6</sub>,  $C_{2h}$ -Be<sub>2</sub>Na<sub>6</sub>,  $C_{2h}$ -Be<sub>2</sub>Li<sub>4</sub>Na<sub>2</sub>,  $C_{2h}$ -Be<sub>2</sub>Li<sub>4</sub>K<sub>2</sub>,  $C_{2h}$ -Be<sub>2</sub>Na<sub>4</sub>Li<sub>2</sub>,  $C_1$ -Be<sub>2</sub>Na<sub>4</sub>Li<sub>2</sub> and  $D_{4h}$ -Be<sub>2</sub>Na<sub>4</sub>K<sub>2</sub>, together with other parameters to describe the bonding nature inside.

SI4

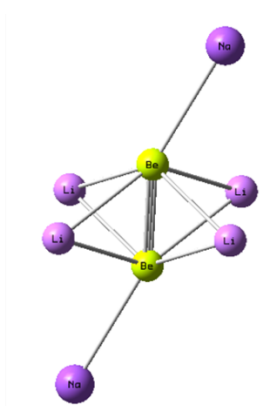

0.00  
**1a** ( $C_{2h}$ ,  $^1A$ )

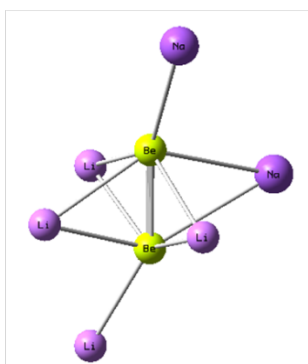

4.77  
**1b** ( $C_1$ ,  $^1A$ )

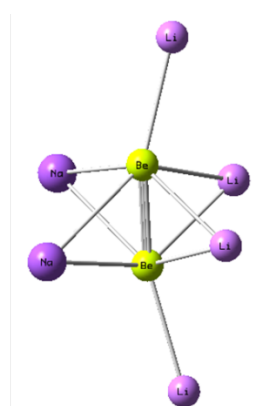

9.55  
**1c** ( $C_1$ ,  $^1A$ )

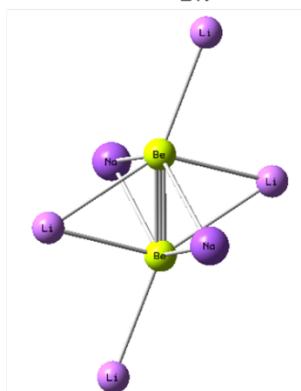

10.63  
**1d** ( $C_i$ ,  $^1A$ )

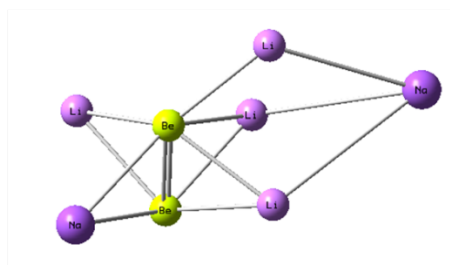

12.05  
**1e** ( $C_1$ ,  $^1A$ )

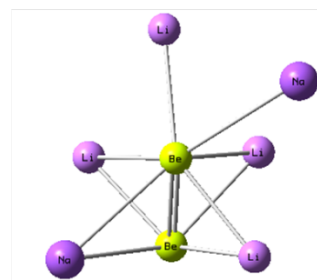

13.71  
**1f** ( $C_1$ ,  $^1A$ )

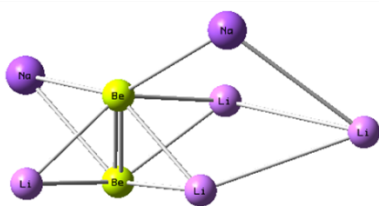

19.14  
**1g** ( $C_1$ ,  $^1A$ )

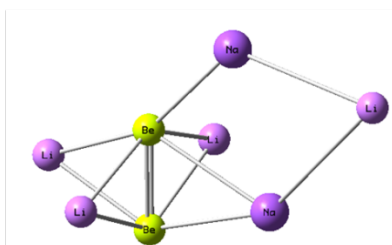

23.52  
**1h** ( $C_1$ ,  $^1A$ )

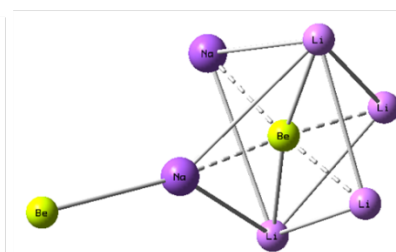

46.51  
**1i** ( $C_s$ ,  $^1A$ )

SI5

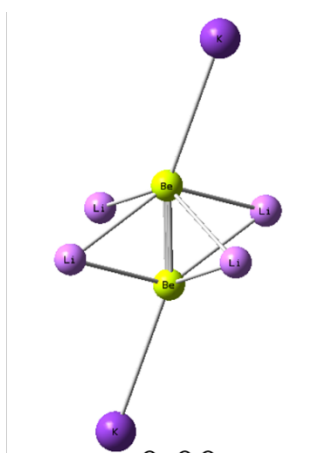

0.00  
**2a** ( $C_{2h}$ ,  $^1A_g$ )

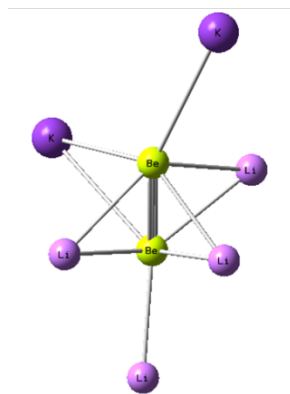

4.90  
**2b** ( $C_1$ ,  $^1A$ )

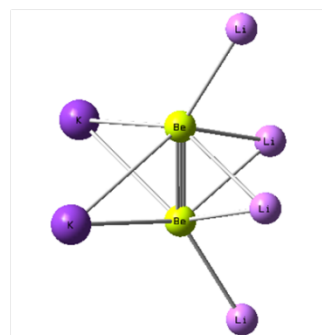

9.81  
**2c** ( $C_2$ ,  $^1A$ )

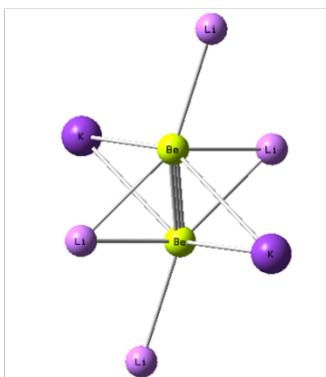

10.27  
**2d** ( $C_{2h}$ ,  $^1A$ )

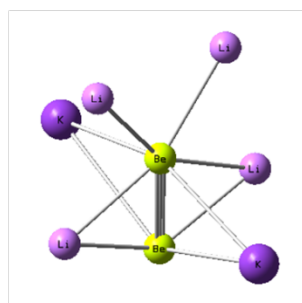

16.04  
**2e** ( $C_{2v}$ ,  $^1A$ )

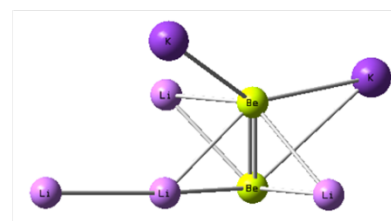

19.93  
**2f** ( $C_1$ ,  $^1A$ )

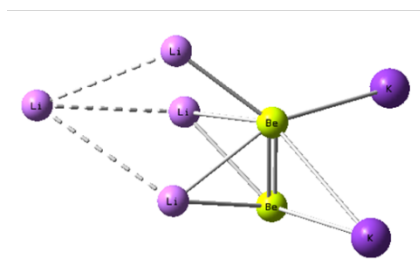

20.65  
**2g** ( $C_s$ ,  $^1A$ )

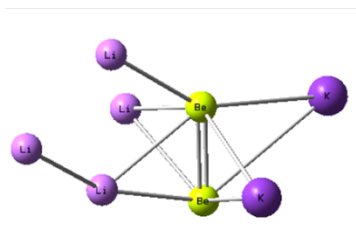

22.50  
**2h** ( $C_1$ ,  $^1A$ )

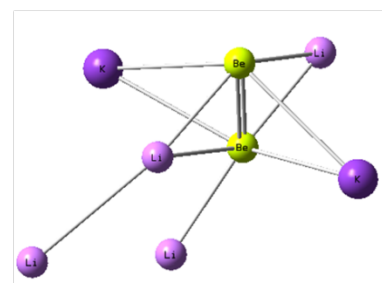

22.57  
**2i** ( $C_1$ ,  $^1A$ )



SI6

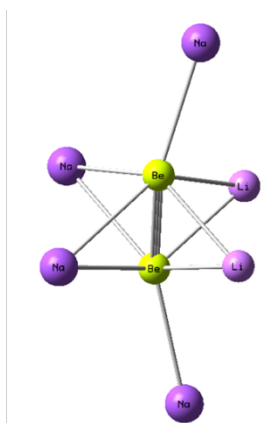

0.00  
**3a** ( $C_1, {}^1A$ )

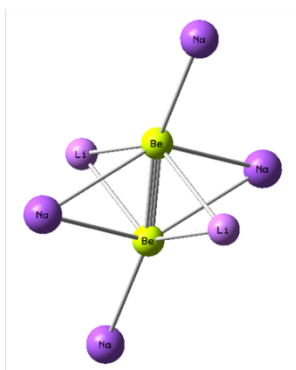

1.18  
**3b** ( $C_{2h}, {}^1A$ )

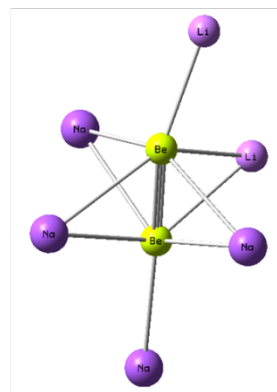

5.51  
**3c** ( $C_1, {}^1A$ )

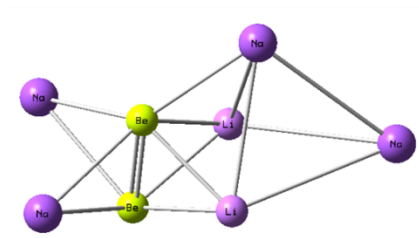

10.17  
**3d** ( $C_s, {}^1A$ )

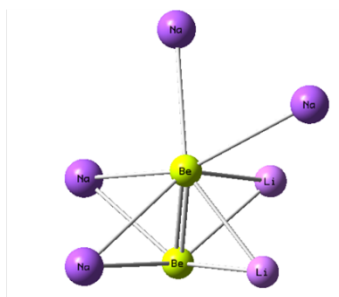

10.47  
**3e** ( $C_1, {}^1A$ )

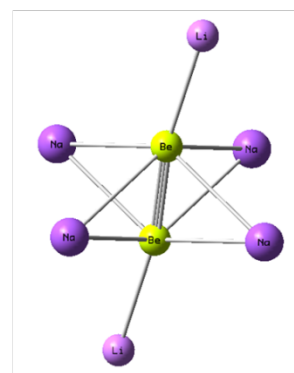

11.38  
**3f** ( $C_{2h}, {}^1A$ )

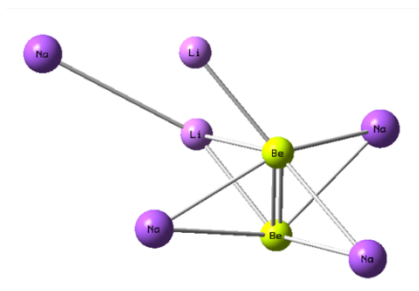

13.31  
**3g** ( $C_1, {}^1A$ )

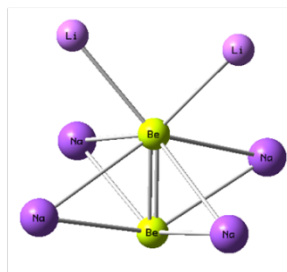

17.99  
**3h** ( $C_{2v}, {}^1A$ )

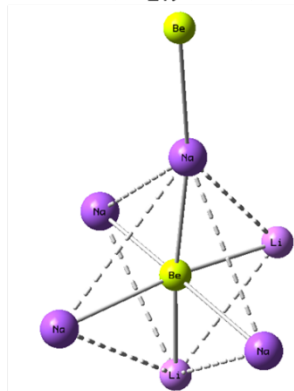

44.08  
**3i** ( $C_s, {}^1A$ )

SI7

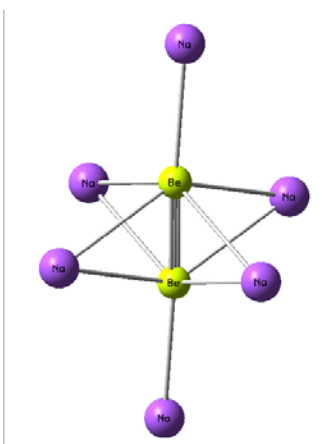

0.0  
**4a** ( $C_{2h}$ ,  $^1A_g$ )

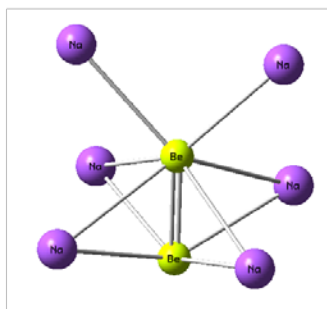

8.89  
**4b** ( $C_2$ ,  $^1A$ )

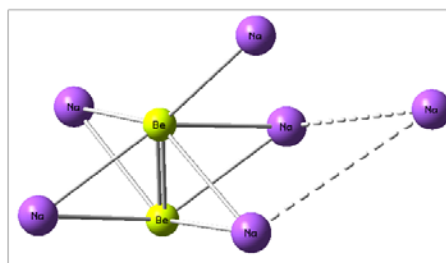

13.65  
**4c** ( $C_s$ ,  $^1A$ )

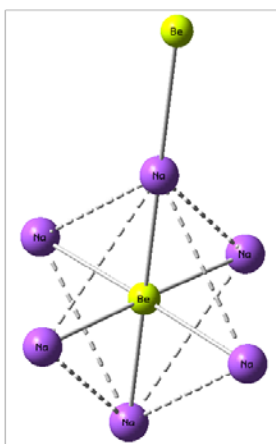

39.99  
**4d** ( $C_{4v}$ ,  $^1A$ )

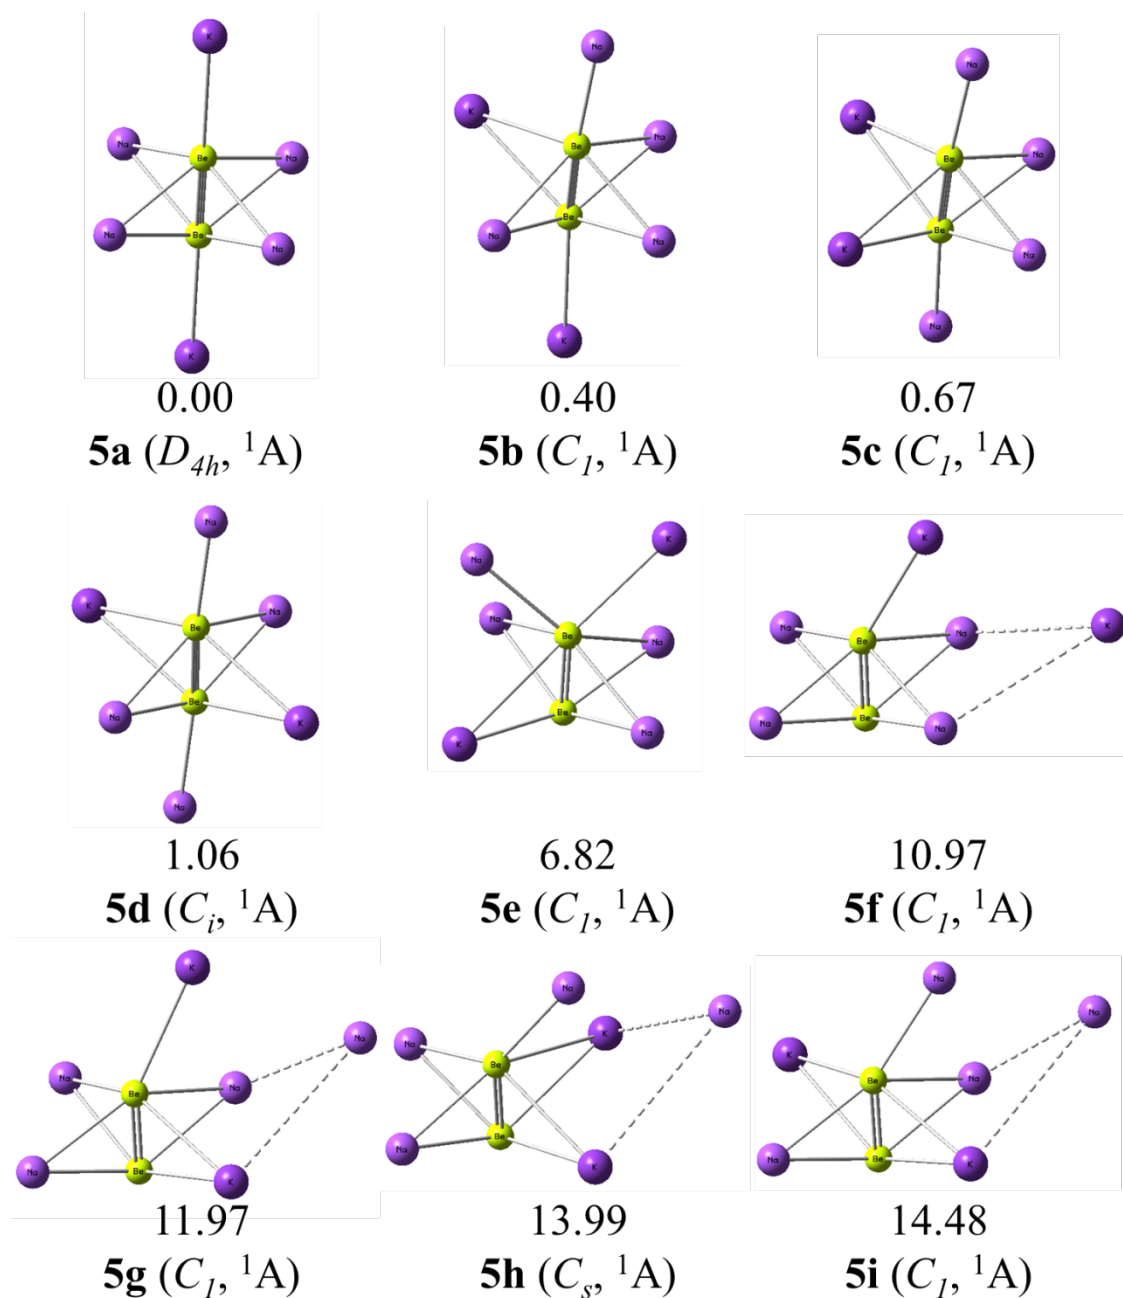

**Figure S3.** The global minimum structure and other low-energy structures of (1) Be<sub>2</sub>Li<sub>4</sub>Na<sub>2</sub>, (2) Be<sub>2</sub>Li<sub>4</sub>K<sub>2</sub>, (3) Be<sub>2</sub>Na<sub>4</sub>Li<sub>2</sub>, (4) Be<sub>2</sub>Na<sub>6</sub> and (5) Be<sub>2</sub>Na<sub>4</sub>K<sub>2</sub> with energy in kcal/mol. These structures are re-optimized and filtrated at the B3LYP/6-31G(d) level after searched by CALYPSO program.

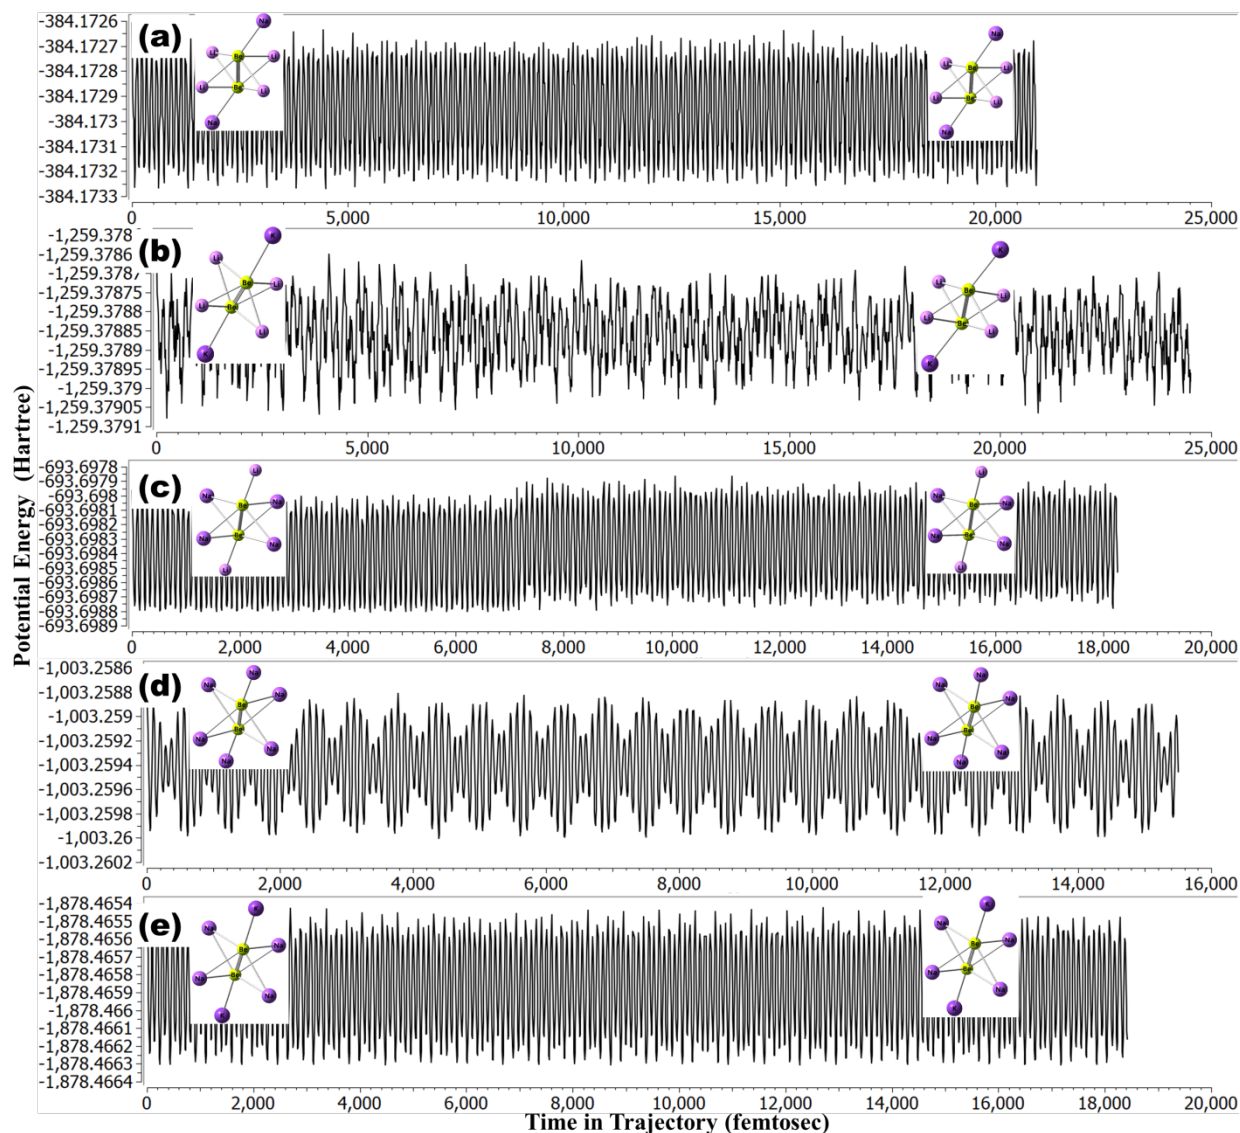

**Figure S4.** The BOMD results of (a)  $C_{2h}$ -Be<sub>2</sub>Li<sub>4</sub>Na<sub>2</sub>, (b)  $C_{2h}$ -Be<sub>2</sub>Li<sub>4</sub>K<sub>2</sub>, (c)  $C_{2h}$ -Be<sub>2</sub>Na<sub>4</sub>Li<sub>2</sub>, (d)  $C_{2h}$ -Be<sub>2</sub>Na<sub>6</sub> and (e)  $D_{4h}$ -Be<sub>2</sub>Na<sub>4</sub>K<sub>2</sub> at the B3LYP/6-31G (d) level. The molecular structure configuration of initial state and final state are also listed as insert.

SI10

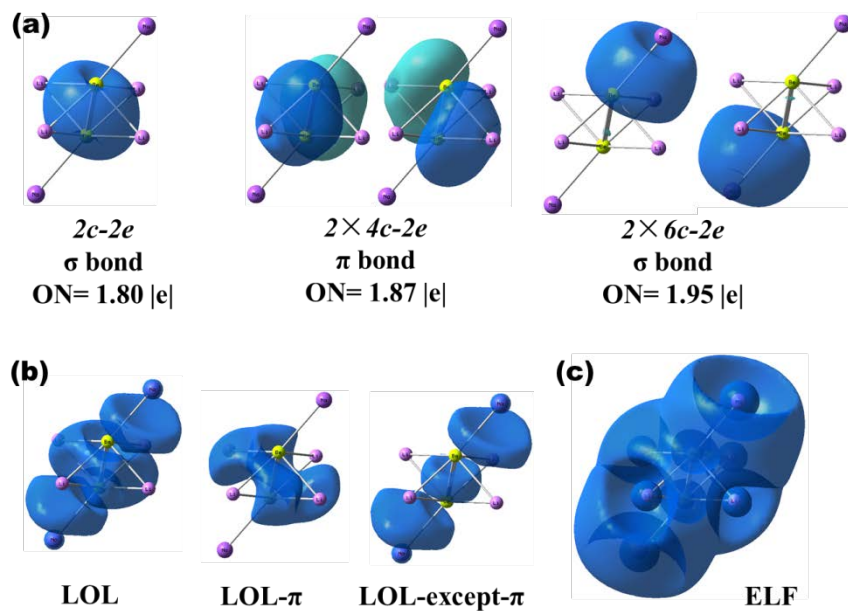

**Figure S5.** (a) AdNDP orbitals, (b) LOL profiles and (c) ELF profile of  $C_{2h}$ -Be<sub>2</sub>Li<sub>4</sub>Na<sub>2</sub>. ON stands for the occupation number.

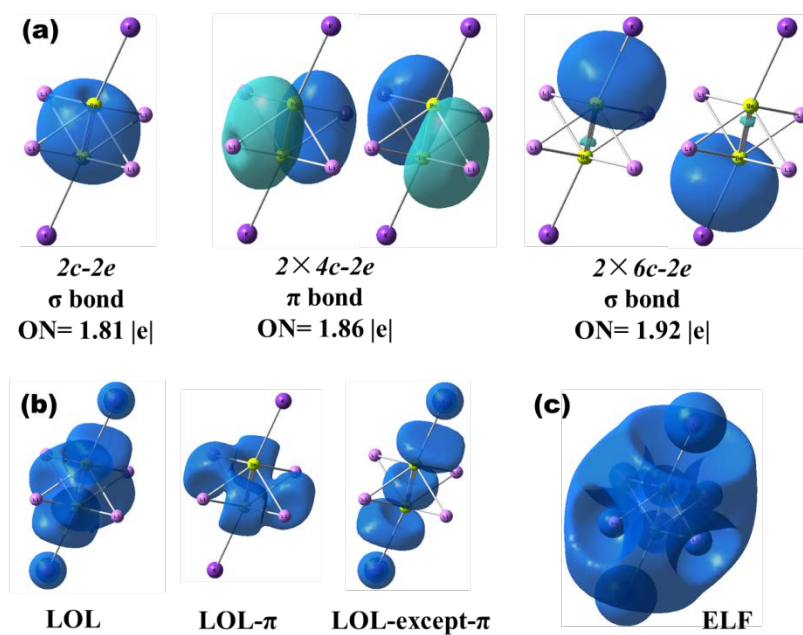

**Figure S6.** (a) AdNDP orbitals, (b) LOL profiles and (c) ELF profile of  $C_{2h}$ -Be<sub>2</sub>Li<sub>4</sub>K<sub>2</sub>. ON stands for the occupation number.

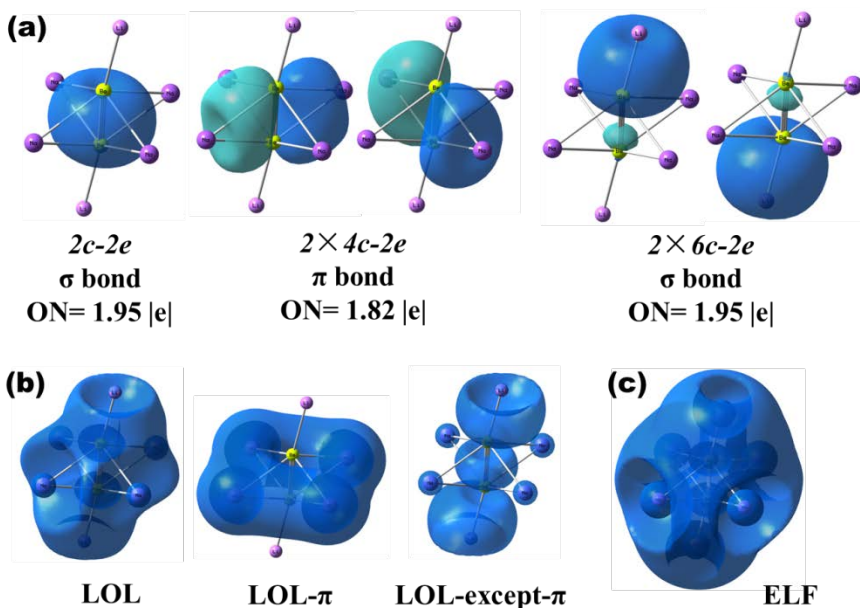

**Figure S7.** (a) AdNDP orbitals, (b) LOL profiles and (c) ELF profile of  $C_{2h}$ -Be<sub>2</sub>Na<sub>4</sub>Li<sub>2</sub>. ON stands for the occupation number.

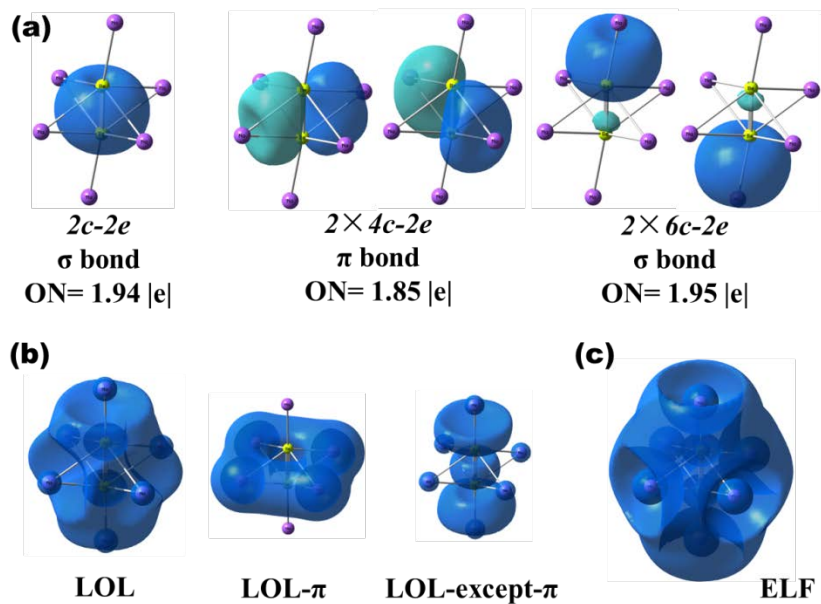

**Figure S8.** (a) AdNDP orbitals, (b) LOL profiles and (c) ELF profile of  $C_{2h}$ -Be<sub>2</sub>Na<sub>6</sub>. ON stands for the occupation number.

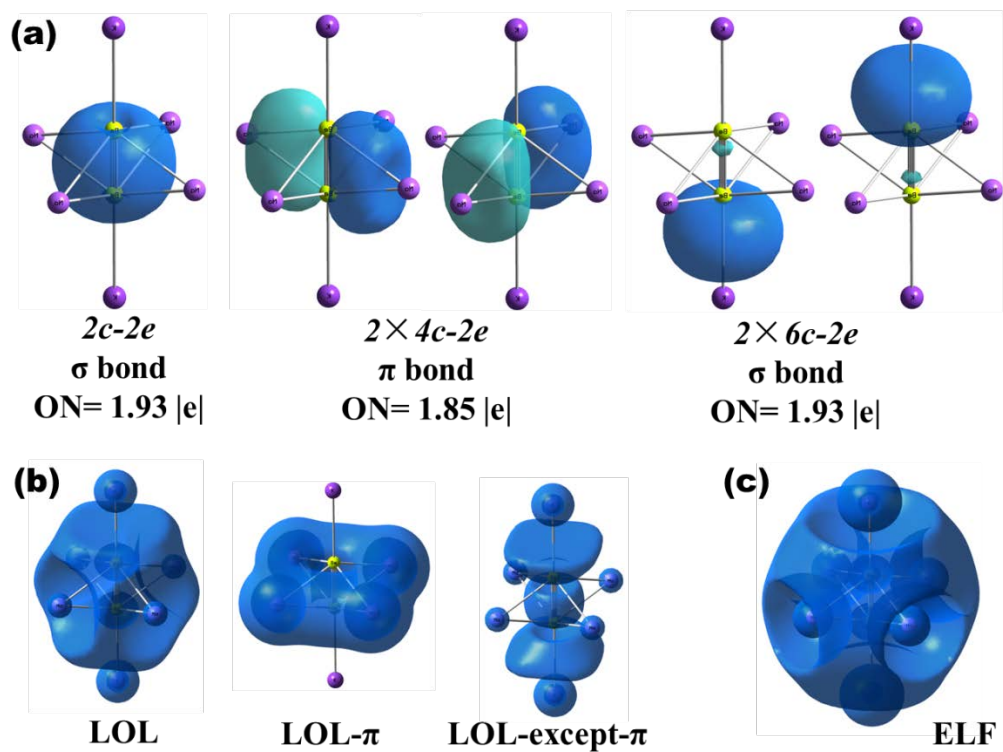

**Figure S9.** (a) AdNDP orbitals, (b) LOL profiles and (c) ELF profile of  $D_{4h}$ -Be<sub>2</sub>Na<sub>4</sub>K<sub>2</sub>. ON stands for the occupation number.

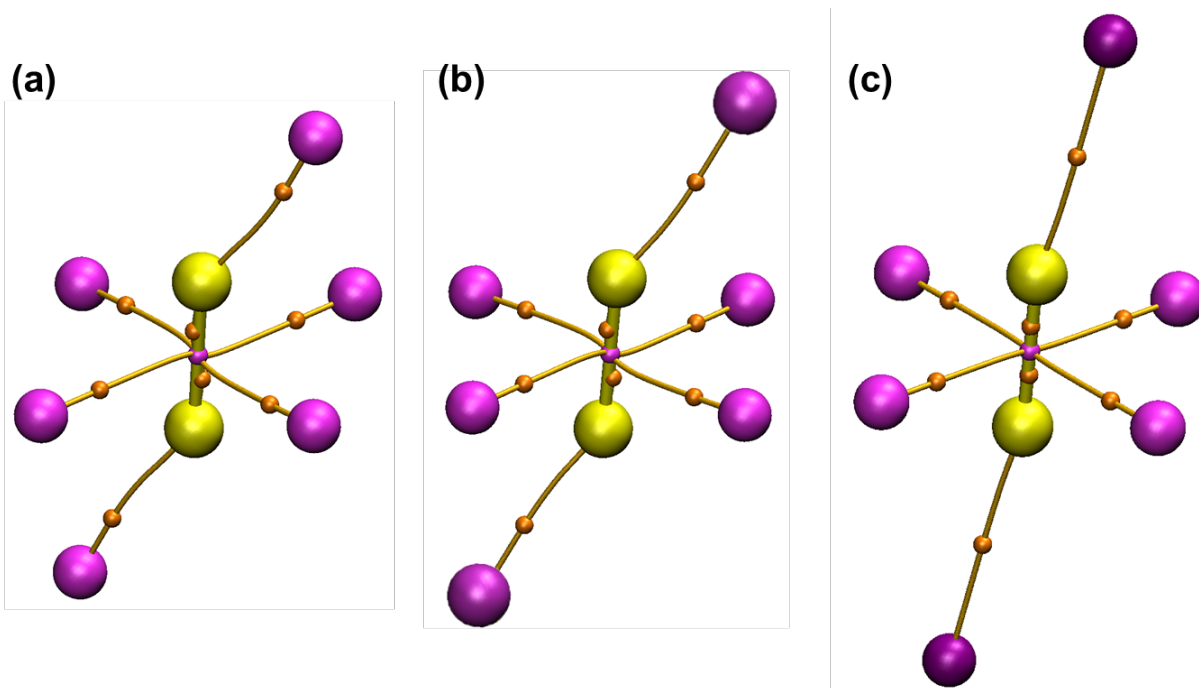

**Figure S10.** AIM (Please refer to R. F. W. Bader, *Atoms in Molecules*, Clarendon Press, Oxford, 1994) results of (a)  $C_{2h}$ -Be<sub>2</sub>Li<sub>6</sub>, (b)  $C_{2h}$ -Be<sub>2</sub>Li<sub>4</sub>Na<sub>2</sub> and (c)  $C_{2h}$ -Be<sub>2</sub>Li<sub>4</sub>K<sub>2</sub>. Here the orange dots are bond critical points (BCP). The orange solid lines represent the path connected the BCP and nuclear critical points (NCP). It should note to be that there is a “Non-nuclear-attractor” (NNA, pink dot in centre) between two Be atoms. At NNA point, the corresponding real space function values are in turn: the density of all electrons is 0.060, 0.058, 0.060; Laplacian of electron density is -0.075, -0.068, -0.073; Electron localization function (ELF): 0.847, 0.814, 0.829; Localized orbital locator (LOL): 0.702, 0.677, 0.688; Ellipticity of electron density: 0.249, 0.282, 0.041. Unit: a.u..



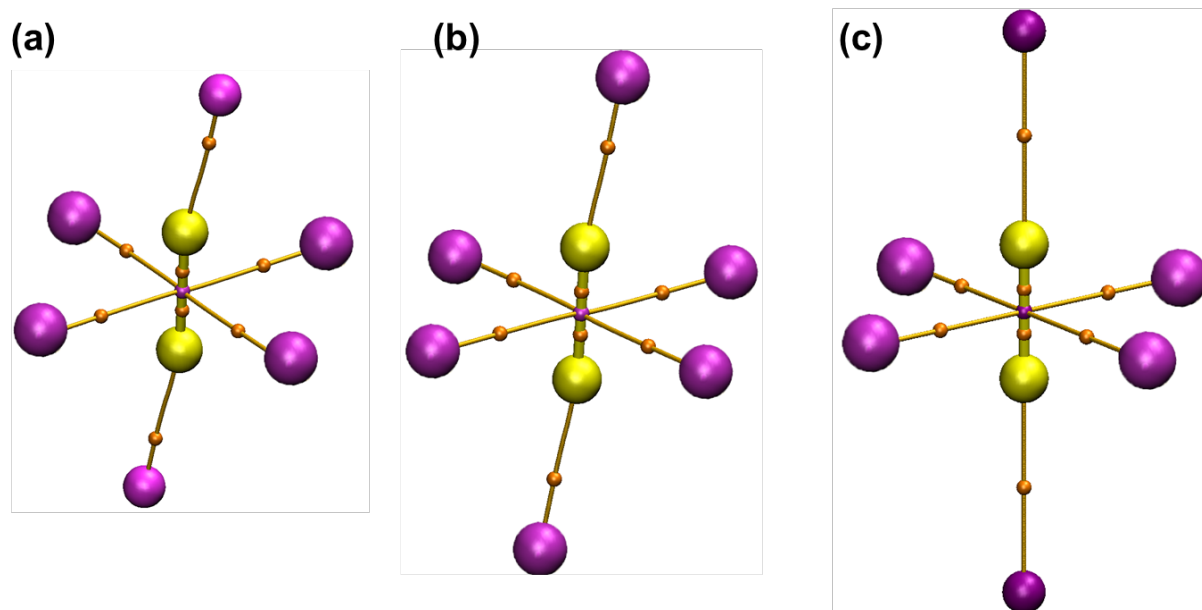

**Figure S11.** AIM results of (a)  $C_{2h}$ -Be<sub>2</sub>Na<sub>4</sub>Li<sub>2</sub>, (b)  $C_{2h}$ -Be<sub>2</sub>Na<sub>6</sub> and (c)  $D_{4h}$ -Be<sub>2</sub>Na<sub>4</sub>K<sub>2</sub>. At NNA point, the corresponding real space function information are in turn: the density of all electrons is 0.066, 0.064, 0.063; Laplacian of electron density is -0.106, -0.100, -0.098; Electron localization function (ELF): 0.944, 0.926, 0.924; Localized orbital locator (LOL): 0.804, 0.780, 0.778; Ellipticity of electron density: 0.011, 0.008, 0.000. Unit: a.u..

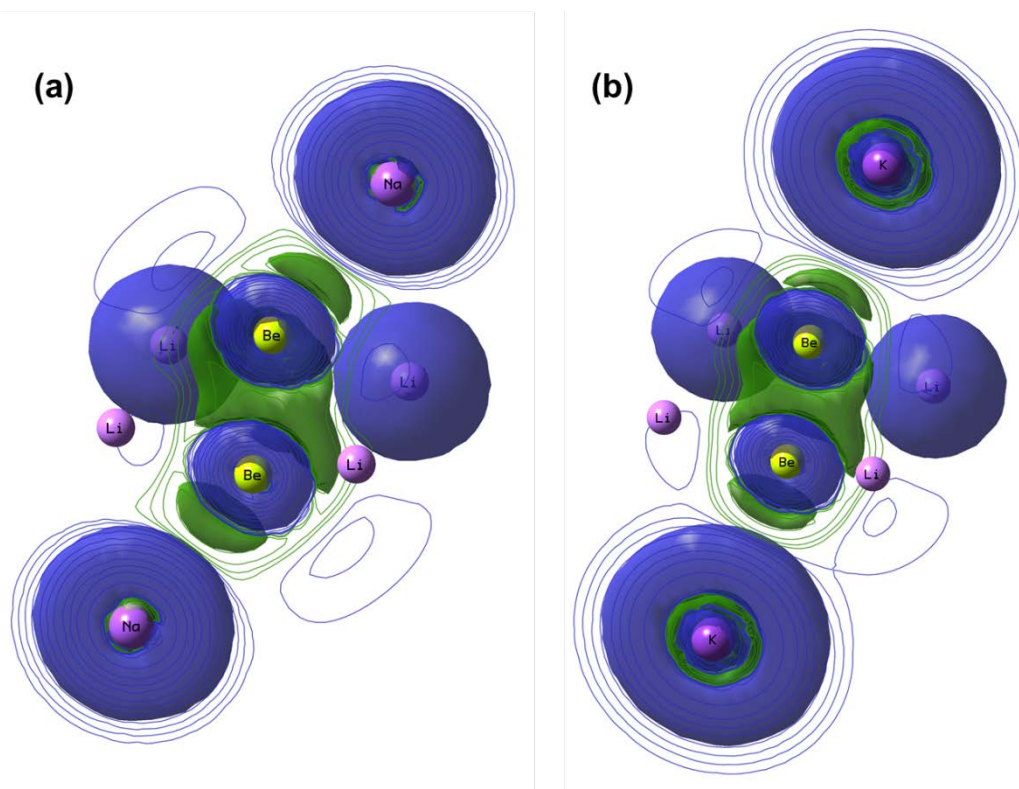

**Figure S12.** Laplacian electron density ( $\nabla^2\rho(r)$ ) plots of (a)  $C_{2h}\text{-Be}_2\text{Li}_4\text{Na}_2$  and (b)  $C_{2h}\text{-Be}_2\text{Li}_4\text{K}_2$ . The green lines including corresponding region indicates the charge concentration ( $\nabla^2\rho(r)<0$ ), while blue lines and region represent the charge depletion ( $\nabla^2\rho(r)>0$ ).

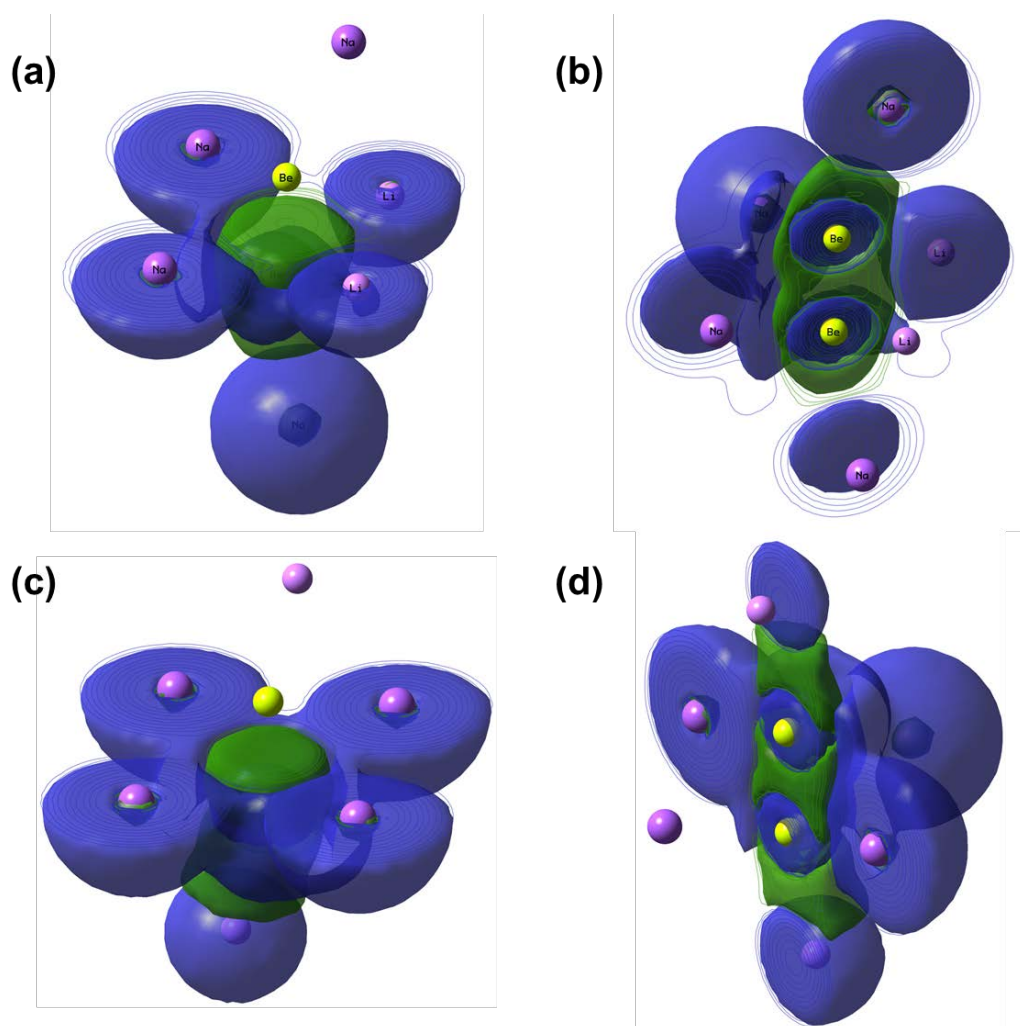

**Figure S13.** Laplacian electron density ( $\nabla^2\rho(r)$ ) plots in two different view (a) Laplacian plot horizontal to  $\text{Li}_2\text{Na}_2$  plane and (b) Laplacian plot along  $\text{Be}_2\text{Na}_3\text{Li}$  plane of  $C_1\text{-Be}_2\text{Na}_4\text{Li}_2$ , (c) Laplacian plot horizontal to  $\text{Na}_4$  plane and (d) Laplacian plot along  $\text{Be}_2\text{Na}_2\text{Li}_2$  of  $C_{2h}\text{-Be}_2\text{Na}_4\text{Li}_2$ . The green region indicates the areas of charge concentration ( $\nabla^2\rho(r)<0$ ), while blue region represents the areas of charge depletion ( $\nabla^2\rho(r)>0$ ).

SI17

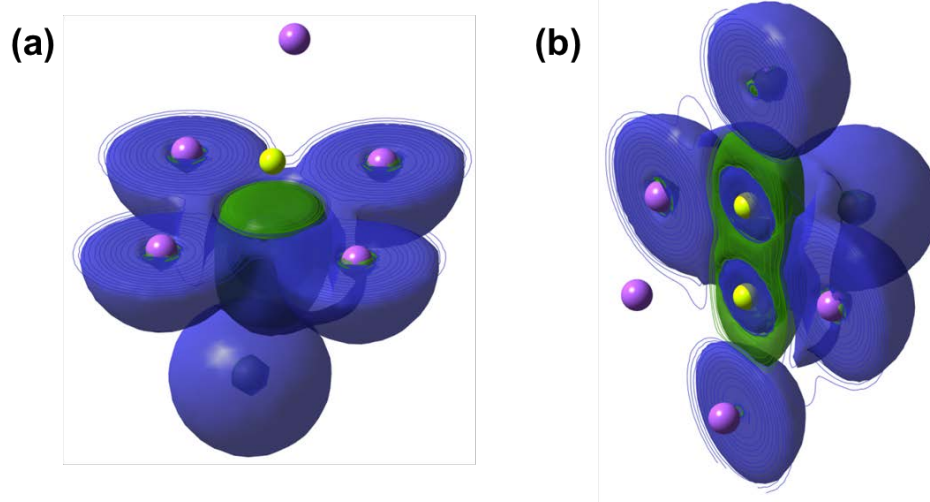

**Figure S14.** Laplacian electron density ( $\nabla^2\rho(r)$ ) plot in two different view of  $C_{2h}$ - $Be_2Na_6$ . (a) Laplacian plot horizontal to  $Na_4$  plane and (b) Laplacian plot along  $Be_2Na_4$  plane. The green region indicates the areas of charge concentration ( $\nabla^2\rho(r)<0$ ), while blue region represents the areas of charge depletion ( $\nabla^2\rho(r)>0$ ).

SI18

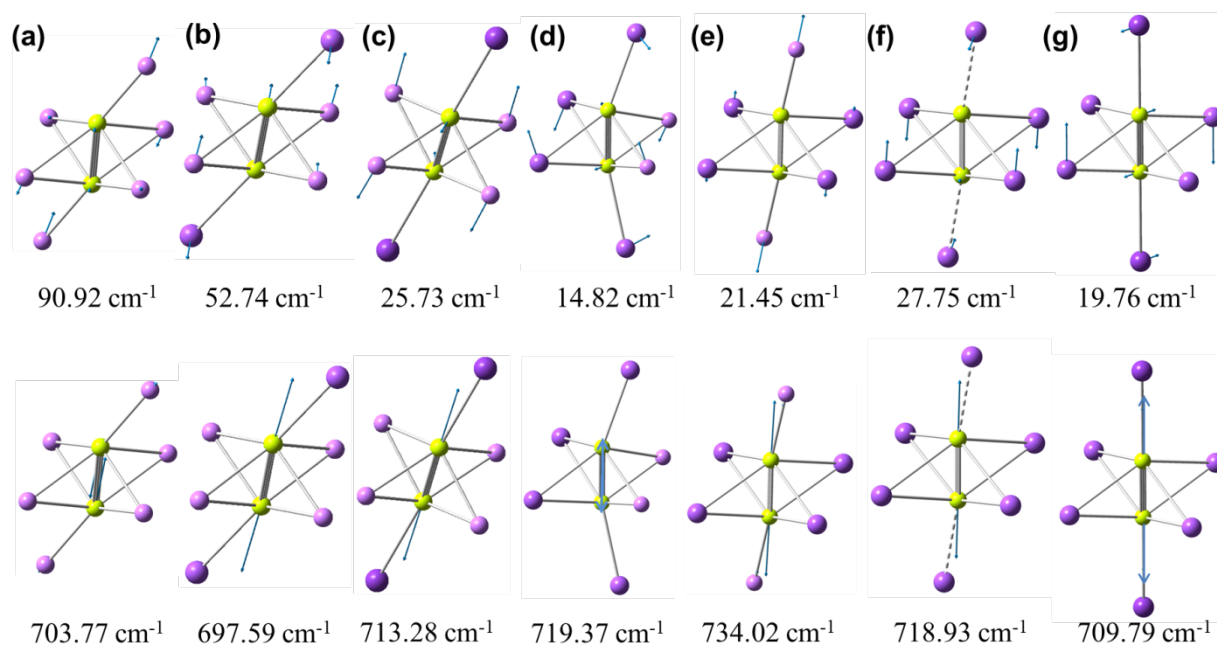

**Figure S15.** The lowest frequency and Be-Be stretching vibrational frequency accompany with their corresponding vibrational modes of (a)  $C_{2h}$ -Be<sub>2</sub>Li<sub>6</sub>, (b)  $C_{2h}$ -Be<sub>2</sub>Li<sub>4</sub>Na<sub>2</sub>, (c)  $C_{2h}$ -Be<sub>2</sub>Li<sub>4</sub>K<sub>2</sub>, (d)  $C_1$ -Be<sub>2</sub>Na<sub>4</sub>Li<sub>2</sub>, (e)  $C_{2h}$ -Be<sub>2</sub>Na<sub>4</sub>Li<sub>2</sub>, (f)  $C_{2h}$ -Be<sub>2</sub>Na<sub>6</sub> and (g)  $D_{4h}$ -Be<sub>2</sub>Na<sub>4</sub>K<sub>2</sub>.

**Scheme S1.** Several potential reactions and thermodynamic values for the generation of  $C_{2h}$ - $Be_2Li_4Na_2$ ,  $C_{2h}$ - $Be_2Li_4K_2$ ,  $C_{2h}$ - $Be_2Na_4Li_2$ ,  $C_{2h}$ - $Be_2Na_6$  and  $D_{4h}$ - $Be_2Na_4K_2$ .

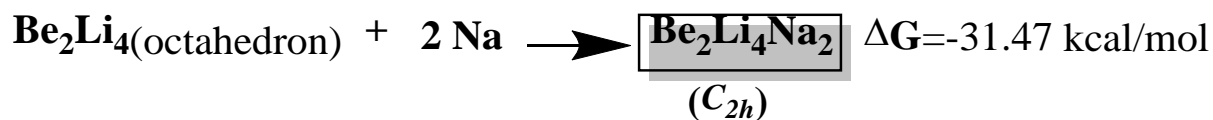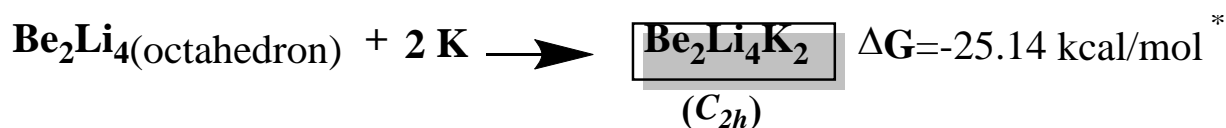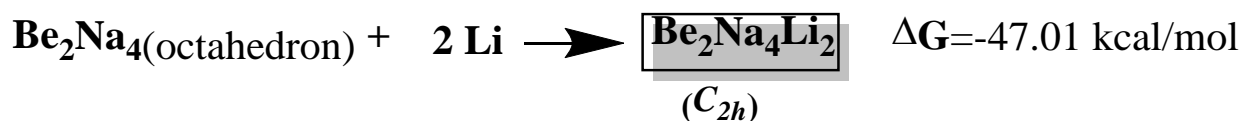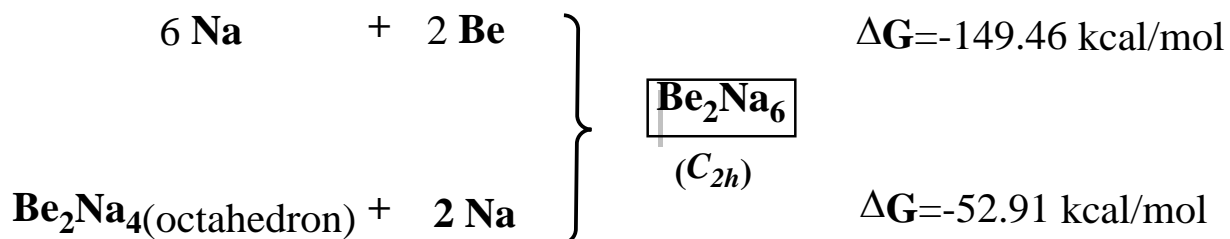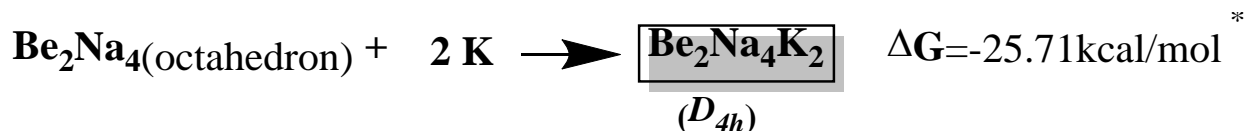

\*: This value is calculated at B3LYP/6-31G\* levels.

**Table S1.** The orbital composition of (1)  $C_{2h}$ -Be<sub>2</sub>Li<sub>4</sub>Na<sub>2</sub>, (2)  $C_{2h}$ -Be<sub>2</sub>Li<sub>4</sub>K<sub>2</sub>, (3)  $C_{2h}$ -Be<sub>2</sub>Na<sub>4</sub>Li<sub>2</sub>, (4)  $C_1$ -Be<sub>2</sub>Na<sub>4</sub>Li<sub>2</sub>, (5)  $C_{2h}$ -Be<sub>2</sub>Na<sub>6</sub> and (6)  $D_{4h}$ -Be<sub>2</sub>Na<sub>4</sub>K<sub>2</sub>. The coefficient of each orbital is given by the contribution from the fragments.

|               | (1) $C_{2h}$ -<br>Be <sub>2</sub> Li <sub>4</sub> Na <sub>2</sub>                             |                                                                                               |                                                                                   |                                                                                                                                        |                                                                                     |
|---------------|-----------------------------------------------------------------------------------------------|-----------------------------------------------------------------------------------------------|-----------------------------------------------------------------------------------|----------------------------------------------------------------------------------------------------------------------------------------|-------------------------------------------------------------------------------------|
|               | Occupied molecular orbitals                                                                   |                                                                                               |                                                                                   |                                                                                                                                        |                                                                                     |
|               | $\sigma$ (HOMO-4)                                                                             | $\sigma^*$ (HOMO-3)                                                                           | $\pi$ (HOMO-2)                                                                    | $\pi$ (HOMO-1)                                                                                                                         | $\sigma$ (HOMO)                                                                     |
| Diagram       | 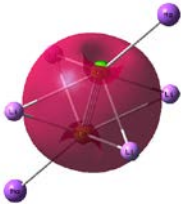             |              |  |                                                     |  |
| Energy(eV)    | -11.11                                                                                        | -6.03                                                                                         | -4.90                                                                             | -4.86                                                                                                                                  | -4.01                                                                               |
| Component (%) | Be <sub>2</sub> @2s~52.2<br>Be <sub>2</sub> @2p <sub>z</sub> ~7.0<br>Li <sub>4</sub> @2s~29.0 | Be <sub>2</sub> @2s~63.6<br>Be <sub>2</sub> @2p <sub>z</sub> ~3.8<br>Na <sub>2</sub> @3s~18.8 | Be <sub>2</sub> @2p <sub>x</sub> ~17.1<br>Li <sub>4</sub> @2s~67.0                | Be <sub>2</sub> @2s~60.0<br>Be <sub>2</sub> @2p <sub>y</sub> ~5.7<br>Be <sub>2</sub> @2p <sub>z</sub> ~3.4<br>Li <sub>4</sub> @2s~24.1 | Be <sub>2</sub> @2p <sub>z</sub> ~11.2<br>Na <sub>2</sub> @3s~72.2                  |

  

|               | (2) $C_{2h}$ -<br>Be <sub>2</sub> Li <sub>4</sub> K <sub>2</sub>                    |                                                                                     |                                                                                     |                                                                                               |                                                                                                                         |
|---------------|-------------------------------------------------------------------------------------|-------------------------------------------------------------------------------------|-------------------------------------------------------------------------------------|-----------------------------------------------------------------------------------------------|-------------------------------------------------------------------------------------------------------------------------|
|               | Occupied molecular orbitals                                                         |                                                                                     |                                                                                     |                                                                                               |                                                                                                                         |
|               | $\sigma$ (HOMO-4)                                                                   | $\sigma^*$ (HOMO-3)                                                                 | $\pi$ (HOMO-2)                                                                      | $\pi$ (HOMO-1)                                                                                | $\sigma$ (HOMO)                                                                                                         |
| Diagram       |  |  |  |          |                                    |
| Energy(eV)    | -10.86                                                                              | -5.33                                                                               | -4.66                                                                               | -4.66                                                                                         | -3.33                                                                                                                   |
| Component (%) | Be <sub>2</sub> @2s~50.1<br>Li <sub>4</sub> @2s~28.9                                | Be <sub>2</sub> @2s~72.6<br>K <sub>2</sub> @4s~10.4                                 | Be <sub>2</sub> @2p <sub>x</sub> ~23.7<br>Li <sub>4</sub> @2s~60.9                  | Be <sub>2</sub> @2s~61.7<br>Be <sub>2</sub> @2p <sub>y</sub> ~6.0<br>Li <sub>4</sub> @2s~22.7 | Be <sub>2</sub> @2s~9.9<br>Be <sub>2</sub> @2p <sub>z</sub> ~12.1<br>K <sub>2</sub> @4s~54.6<br>Li <sub>4</sub> @2s~4.9 |

| (3) $C_{2h}$ -<br>$Be_2Na_4Li_2$ | Occupied molecular orbitals                                                       |                                                                                   |                                                                                   |                                                                                     |                                                                                                 |
|----------------------------------|-----------------------------------------------------------------------------------|-----------------------------------------------------------------------------------|-----------------------------------------------------------------------------------|-------------------------------------------------------------------------------------|-------------------------------------------------------------------------------------------------|
|                                  | $\sigma$ (HOMO-4)                                                                 | $\sigma^*$ (HOMO-3)                                                               | $\pi$ (HOMO-2)                                                                    | $\pi$ (HOMO-1)                                                                      | $\sigma$ (HOMO)                                                                                 |
| Diagram                          | 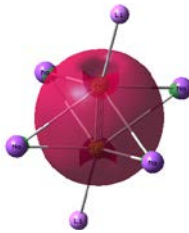 |  |  |  |              |
| Energy(eV)                       | -10.35                                                                            | -5.99                                                                             | -4.19                                                                             | -4.19                                                                               | -4.17                                                                                           |
| Component (%)                    | Be <sub>2</sub> @2s~53.4<br>Na <sub>4</sub> @3s~28.4                              | Be <sub>2</sub> @2s~49.8<br>Li <sub>2-z</sub> @3s~34.8                            | Be <sub>2</sub> @2p <sub>y</sub> ~12.0<br>Na <sub>4</sub> @3s~74.9                | Be <sub>2</sub> @2p <sub>x</sub> ~10.9<br>Na <sub>4</sub> @3s~73.0                  | Be <sub>2</sub> @2p <sub>s</sub> ~17.8<br>Li <sub>2-z</sub> @2s~58.5<br>Na <sub>4</sub> @3s~8.0 |

| (4) $C_{1-}$<br>$Be_2Na_4Li_2$ | Occupied molecular orbitals                                                            |                                                                                     |                                                                                                      |                                                                                                                                  |                                                                                                                                   |
|--------------------------------|----------------------------------------------------------------------------------------|-------------------------------------------------------------------------------------|------------------------------------------------------------------------------------------------------|----------------------------------------------------------------------------------------------------------------------------------|-----------------------------------------------------------------------------------------------------------------------------------|
|                                | $\sigma$ (HOMO-4)                                                                      | $\sigma^*$ (HOMO-3)                                                                 | $\pi$ (HOMO-2)                                                                                       | $\pi$ (HOMO-1)                                                                                                                   | $\sigma$ (HOMO)                                                                                                                   |
| Diagram                        | 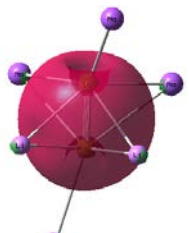    |  |                   |                                              |                                              |
| Energy (eV)                    | -10.80                                                                                 | -5.80                                                                               | -4.62                                                                                                | -4.58                                                                                                                            | -3.91                                                                                                                             |
| Component (%)                  | Be <sub>2</sub> @2s~52.9<br>Na <sub>2-xy</sub> @3s~10.6<br>Li <sub>2-xy</sub> @2s~18.0 | Be <sub>2</sub> @2s~54.9<br>Na <sub>2-z</sub> @3s~29.4                              | Be <sub>2</sub> @2p <sub>y</sub> ~14.7<br>Na <sub>2-xy</sub> @3s~36.1<br>Li <sub>2-xy</sub> @2s~28.4 | Be <sub>2</sub> @2p <sub>x</sub> ~12.0<br>Be <sub>2</sub> @2s~13.3<br>Na <sub>2-xy</sub> @3s~33.6<br>Li <sub>2-xy</sub> @2s~27.7 | Be <sub>2</sub> @2p <sub>z</sub> ~12.5<br>Na <sub>2-z</sub> @3s~57.8<br>Na <sub>2-xy</sub> @3s~13.6<br>Li <sub>2-xy</sub> @2s~1.9 |



| (5) $C_{2h}$ -<br><b>Be<sub>2</sub>Na<sub>6</sub></b> | Occupied molecular orbitals                          |                                                        |                                                                    |                                                                    |                                                                                                 |
|-------------------------------------------------------|------------------------------------------------------|--------------------------------------------------------|--------------------------------------------------------------------|--------------------------------------------------------------------|-------------------------------------------------------------------------------------------------|
|                                                       | $\sigma$ (HOMO-4)                                    | $\sigma^*$ (HOMO-3)                                    | $\pi$ (HOMO-2)                                                     | $\pi$ (HOMO-1)                                                     | $\sigma$ (HOMO)                                                                                 |
| Diagram                                               |                                                      |                                                        |                                                                    |                                                                    |                                                                                                 |
| Energy(eV)                                            | -10.40                                               | -5.62                                                  | -4.25                                                              | -4.15                                                              | -3.90                                                                                           |
| Component (%)                                         | Be <sub>2</sub> @2s~53.6<br>Na <sub>4</sub> @3s~26.9 | Be <sub>2</sub> @2s~55.1<br>Na <sub>2-z</sub> @3s~30.5 | Be <sub>2</sub> @2p <sub>y</sub> ~13.6<br>Na <sub>4</sub> @3s~73.7 | Be <sub>2</sub> @2p <sub>x</sub> ~10.7<br>Na <sub>4</sub> @3s~72.7 | Be <sub>2</sub> @2p <sub>z</sub> ~13.0<br>Na <sub>2-z</sub> @3s~62.1<br>Na <sub>4</sub> @3s~9.5 |

Na<sub>2-z</sub> represents two vertex Na atoms. Na<sub>4</sub> represents four Na atoms on the equatorial plane.

| (6) $D_{4h}$ -<br><b>Be<sub>2</sub>Na<sub>4</sub>K<sub>2</sub></b> | Occupied molecular orbitals                          |                                                                                                 |                                                                     |                                                                     |                                                                                                 |
|--------------------------------------------------------------------|------------------------------------------------------|-------------------------------------------------------------------------------------------------|---------------------------------------------------------------------|---------------------------------------------------------------------|-------------------------------------------------------------------------------------------------|
|                                                                    | $\sigma$ (HOMO-3)                                    | $\sigma^*$ (HOMO-2)                                                                             | Degenerated- $\pi$ (HOMO-1)                                         | $\sigma$ (HOMO)                                                     |                                                                                                 |
| Diagram                                                            |                                                      |                                                                                                 |                                                                     |                                                                     |                                                                                                 |
| Energy(eV)                                                         | -10.28                                               | -5.11                                                                                           | -4.10                                                               | -3.33                                                               |                                                                                                 |
| Component (%)                                                      | Be <sub>2</sub> @2s~52.3<br>Na <sub>4</sub> @3s~25.7 | Be <sub>2</sub> @2s~39.3<br>Be <sub>2</sub> @2p <sub>z</sub> ~35.8<br>K <sub>2-z</sub> @4s~13.2 | Be <sub>2</sub> @2p <sub>y</sub> ~16.8<br>Na <sub>2y</sub> @3s~72.4 | Be <sub>2</sub> @2p <sub>x</sub> ~16.8<br>Na <sub>2x</sub> @3s~72.4 | Be <sub>2</sub> @2p <sub>z</sub> ~20.6<br>K <sub>2-z</sub> @4s~44.8<br>Na <sub>4</sub> @3s~22.7 |

**SI23**

Coordinates of **(1)** Be<sub>2</sub>Li<sub>4</sub>Na<sub>2</sub>, **(2)** Be<sub>2</sub>Li<sub>4</sub>K<sub>2</sub>, **(3)** Be<sub>2</sub>Na<sub>4</sub>Li<sub>2</sub>, **(4)** Be<sub>2</sub>Na<sub>6</sub> and **(5)** Be<sub>2</sub>Na<sub>4</sub>K<sub>2</sub>. All of them are obtained at the B3LYP/6-31G(d) level.

**Part A----- Be<sub>2</sub>Li<sub>4</sub>Y<sub>2</sub>****Be<sub>2</sub>Li<sub>4</sub>Na<sub>2</sub>--(1)****1a**

|    |             |             |             |
|----|-------------|-------------|-------------|
| Be | -0.36329605 | -0.90378785 | 0.00000000  |
| Be | 0.36329605  | 0.90378785  | 0.00000000  |
| Li | 1.43283389  | -0.67478587 | 1.53946245  |
| Li | -1.43283389 | 0.67478587  | -1.53946245 |
| Li | 1.43283389  | -0.67478587 | -1.53946245 |
| Li | -1.43283389 | 0.67478587  | 1.53946245  |
| Na | 0.11424508  | 3.56434214  | 0.00000000  |
| Na | -0.11424508 | -3.56434214 | 0.00000000  |

**1b**

|    |             |             |             |
|----|-------------|-------------|-------------|
| Be | -0.23858500 | -0.45727400 | -0.30150400 |
| Be | 1.61273700  | -0.51644700 | 0.34508400  |
| Na | 0.76209500  | 2.07210100  | 0.02356200  |
| Na | -2.90634800 | -0.31315500 | -0.13717700 |
| Li | 0.73119700  | -2.65631200 | 0.02887600  |
| Li | 3.85955700  | -1.38343400 | 0.26409500  |
| Li | -0.12414500 | -0.50788400 | 2.07897200  |
| Li | 1.56344900  | -0.60354200 | -2.01346100 |

**1c**

|    |             |            |             |
|----|-------------|------------|-------------|
| Be | 0.47177400  | 0.58085700 | -0.86613500 |
| Be | -0.47320800 | 0.58702300 | 0.86316600  |

|    |             |             |             |
|----|-------------|-------------|-------------|
| Na | 1.76788800  | -1.11969600 | 0.78302500  |
| Na | -1.76495000 | -1.12886600 | -0.77476900 |
| Li | -1.36318700 | 2.14327400  | -0.64607700 |
| Li | 1.35735600  | 2.15357300  | 0.62870000  |
| Li | -2.20212000 | 1.20447500  | 2.43448500  |
| Li | 2.19909000  | 1.18623300  | -2.44342000 |

### **1d**

|    |             |             |             |
|----|-------------|-------------|-------------|
| Be | -0.03726999 | 0.90798494  | -0.41872405 |
| Be | 0.03726999  | -0.90798494 | 0.41872405  |
| Na | -2.52807111 | -0.09341876 | 0.00282900  |
| Na | 2.52807111  | 0.09341876  | -0.00282900 |
| Li | 0.04094077  | -1.07806712 | -1.93260699 |
| Li | -0.04094077 | 1.07806712  | 1.93260699  |
| Li | 0.20605453  | -3.29652806 | 0.48784208  |
| Li | -0.20605453 | 3.29652806  | -0.48784208 |

### **1e**

|    |             |             |             |
|----|-------------|-------------|-------------|
| Be | -1.22604100 | 0.68691400  | -1.23372600 |
| Be | -0.83540600 | 0.35539500  | 0.66279200  |
| Na | 3.80179900  | -0.29642000 | -0.09970600 |
| Na | -3.21474000 | -0.82401600 | 0.05872300  |
| Li | 0.39460800  | -1.17647300 | -0.78709800 |
| Li | 1.28061600  | -0.10472000 | 1.80897700  |
| Li | -2.03359500 | 2.43679500  | 0.36717500  |
| Li | 0.95441600  | 1.56291400  | -0.47754000 |

### **1f**

|    |             |            |             |
|----|-------------|------------|-------------|
| Be | -0.01738700 | 0.24015500 | -0.16105400 |
|----|-------------|------------|-------------|

|    |             |             |             |
|----|-------------|-------------|-------------|
| Be | 1.19345000  | 0.59308600  | 1.38792400  |
| Na | 2.63305000  | -0.76437400 | -0.52259400 |
| Na | -2.79330100 | -0.67183100 | -0.27670800 |
| Li | 1.43053200  | 2.31561000  | -0.20829400 |
| Li | -1.28030700 | 1.76015800  | -1.58428000 |
| Li | -1.05048800 | 1.53788600  | 1.52913100  |
| Li | -0.08023200 | -1.45855900 | 1.55839000  |

### **1g**

|    |             |             |             |
|----|-------------|-------------|-------------|
| Be | 1.08594800  | 1.53041000  | -0.14696800 |
| Be | 0.30321600  | -0.16388300 | 0.45895200  |
| Na | -2.28487100 | -1.14199100 | 0.38171400  |
| Na | 2.86531300  | -0.58500900 | -0.46629300 |
| Li | -0.51085200 | 0.48211700  | -1.74820100 |
| Li | -3.72542800 | 1.26775600  | -1.26635500 |
| Li | -1.21358100 | 1.73606100  | 0.65620400  |
| Li | 1.46935300  | 1.02436400  | 2.25249500  |

### **1h**

|    |             |             |             |
|----|-------------|-------------|-------------|
| Be | 2.22699000  | 0.89886200  | 0.04541800  |
| Be | 1.18044200  | -0.77663400 | -0.02970100 |
| Na | -1.54487200 | -1.46006100 | -0.02766300 |
| Na | -0.52730800 | 1.56702400  | 0.01185800  |
| Li | 1.64659300  | -0.08582700 | 2.23087600  |
| Li | 3.59085000  | -1.15205600 | 0.01161000  |
| Li | 1.74469200  | 0.04796200  | -2.22118300 |
| Li | -3.92738700 | 0.63475200  | 0.01569300  |

### **1i**

|    |             |             |             |
|----|-------------|-------------|-------------|
| Be | 0.84409817  | 0.66289381  | 0.00000000  |
| Be | -4.71647883 | -0.72597519 | 0.00000000  |
| Na | -1.73243083 | 0.21943281  | 0.00000000  |
| Na | 1.64520817  | -1.81473619 | 0.00000000  |
| Li | 0.97926806  | 0.84144138  | -2.32267503 |
| Li | 0.97926806  | 0.84144138  | 2.32267503  |
| Li | 3.05440717  | 1.31269681  | 0.00000000  |
| Li | 0.46502917  | 2.93464081  | 0.00000000  |

### **Be<sub>2</sub>Li<sub>4</sub>K<sub>2</sub>--(2)**

#### **2a**

|    |             |             |             |
|----|-------------|-------------|-------------|
| Be | 0.12555200  | 0.96487000  | 0.00000000  |
| Be | -0.12555200 | -0.96487000 | 0.00000000  |
| K  | -1.56249500 | -3.74218300 | 0.00000000  |
| K  | 1.56249500  | 3.74218300  | 0.00000000  |
| Li | -1.56249500 | 0.16964400  | 1.55385300  |
| Li | 1.56249500  | -0.16964400 | 1.55385300  |
| Li | 1.56249500  | -0.16964400 | -1.55385300 |
| Li | -1.56249500 | 0.16964400  | -1.55385300 |

#### **2b**

|    |             |            |             |
|----|-------------|------------|-------------|
| Be | 0.16434200  | 0.60593600 | -0.21189700 |
| Be | -1.44473900 | 1.58429600 | 0.32065400  |
| Li | -1.12960200 | 1.64939100 | -2.03281200 |
| Li | -2.89379000 | 3.47736900 | 0.10178300  |
| Li | 0.46328700  | 2.98235600 | 0.11940300  |
| Li | -0.05463700 | 0.84875400 | 2.18680300  |

K -2.30705900 -1.47330000 -0.01053000

K 3.14736500 -0.40220200 -0.07160500

## 2c

Be 0.97729306 0.04474473 1.00218112

Be -0.97729306 -0.04474473 1.00218112

Li 0.07051381 -1.44623248 2.63779779

Li -0.07051381 1.44623248 2.63779779

Li -3.07171613 -0.26825147 2.15211141

Li 3.07171613 0.26825147 2.15211141

K -0.04730265 2.38130894 -0.96376278

K 0.04730265 -2.38130894 -0.96376278

## 2d

Be 0.44699520 -0.87755399 0.00000000

Be -0.44699520 0.87755399 0.00000000

Li 1.90536794 1.13613119 0.00000000

Li -0.49312534 3.31477988 0.00000000

Li -1.90536794 -1.13613119 0.00000000

Li 0.49312534 -3.31477988 0.00000000

K -0.00000000 -0.00000000 3.04895324

K -0.00000000 -0.00000000 -3.04895324

## 2e

Be 0.00000000 0.00000000 0.53533585

Be 0.00000000 -0.00000000 -1.45984216

Li -2.22033951 0.00000000 -0.53274565

Li -1.50242518 0.00000000 2.42709954

Li 1.50242518 0.00000000 2.42709954

|    |            |             |             |
|----|------------|-------------|-------------|
| Li | 2.22033951 | 0.00000000  | -0.53274565 |
| K  | 0.00000000 | 3.09030519  | -0.20248820 |
| K  | 0.00000000 | -3.09030519 | -0.20248820 |

## **2f**

|    |             |             |             |
|----|-------------|-------------|-------------|
| Be | -1.06826600 | 1.92041700  | 0.04327400  |
| Be | -0.15330800 | 0.15382100  | 0.04903300  |
| Li | -0.52436300 | 1.01062100  | 2.27476800  |
| Li | 4.49041500  | 2.28003700  | -0.14422400 |
| Li | 1.40653300  | 2.08322400  | 0.08500500  |
| Li | -0.39520400 | 1.05784400  | -2.17416800 |
| K  | -3.35296700 | -0.42231500 | -0.03572800 |
| K  | 2.82423800  | -1.02990200 | 0.00976100  |

## **2g**

|    |             |             |             |
|----|-------------|-------------|-------------|
| Be | 0.54001895  | 0.94370387  | 0.00000000  |
| Be | -1.42853402 | 0.60486570  | 0.00000000  |
| Li | -0.66964530 | 2.53692257  | 1.38889208  |
| Li | -0.66964530 | 2.53692257  | -1.38889208 |
| Li | 1.79309177  | 3.02173196  | 0.00000000  |
| Li | -0.09969644 | 5.36874278  | 0.00000000  |
| K  | 0.06555495  | -1.21883675 | 2.34639141  |
| K  | 0.06555495  | -1.21883675 | -2.34639141 |

## **2h**

|    |             |            |             |
|----|-------------|------------|-------------|
| Be | 0.01586700  | 0.92549200 | -0.43854600 |
| Be | -0.29407200 | 0.67359100 | 1.51970900  |
| Li | 4.53500600  | 2.24962200 | -0.42221000 |
| Li | 1.75536300  | 2.15526200 | -1.60574800 |

|    |             |             |             |
|----|-------------|-------------|-------------|
| Li | -0.90052300 | 2.90453700  | 0.56753700  |
| Li | 1.85686600  | 1.79485100  | 1.06059600  |
| K  | 1.91680300  | -1.54691900 | 0.02415400  |
| K  | -3.00245100 | -0.22724700 | -0.18863700 |

## **2i**

|    |             |             |             |
|----|-------------|-------------|-------------|
| Be | 0.13162000  | -0.25358600 | 0.75441800  |
| Be | 0.23563200  | -0.99092700 | -1.09824700 |
| Li | -1.90841400 | 3.94139100  | -0.19536600 |
| Li | 0.48333200  | -2.68204200 | 0.76346200  |
| Li | -0.20982400 | 1.45116000  | -1.09417900 |
| Li | -0.45715200 | 1.98247800  | 1.54970100  |
| K  | -2.94371800 | -0.51639800 | -0.04516400 |
| K  | 3.19672700  | 0.03740200  | -0.04407500 |

## **Part B-----Be<sub>2</sub>Na<sub>4</sub>Y<sub>2</sub>**

### **Be<sub>2</sub>Na<sub>4</sub>Li<sub>2</sub>--(3)**

#### **3a**

|    |             |             |             |
|----|-------------|-------------|-------------|
| Be | 0.94904979  | -0.34264273 | 0.00934959  |
| Be | -0.94222454 | 0.00277934  | -0.35611765 |
| Na | 0.53862045  | 2.34913405  | -0.25709787 |
| Na | -0.55231394 | -0.20028335 | 2.34465472  |
| Na | -3.50505206 | -0.44676194 | -0.85534937 |
| Na | 3.51112815  | -0.86984627 | -0.40993681 |
| Li | -0.42358410 | -2.30766604 | -0.24352041 |
| Li | 0.44241421  | -0.29073859 | -2.30911461 |

#### **3b**



|    |             |             |             |
|----|-------------|-------------|-------------|
| Be | 0.28998386  | 0.93468815  | 0.00000000  |
| Be | -0.28998386 | -0.93468815 | 0.00000000  |
| Na | 0.00000000  | 0.00000000  | 2.54091400  |
| Na | 0.09492680  | 3.58938658  | 0.00000000  |
| Na | 0.00000000  | 0.00000000  | -2.54091400 |
| Na | -0.09492680 | -3.58938658 | 0.00000000  |
| Li | 2.09352068  | -0.75148115 | 0.00000000  |
| Li | -2.09352068 | 0.75148115  | 0.00000000  |

### **3c**

|    |             |             |             |
|----|-------------|-------------|-------------|
| Be | -1.47637336 | 0.18873912  | -0.17491836 |
| Be | 0.46672005  | -0.07526268 | -0.36915360 |
| Na | -0.23638050 | 0.01257027  | 2.29445574  |
| Na | -0.26654585 | 2.59379752  | -0.36666265 |
| Na | -0.97961962 | -2.44798718 | -0.38504428 |
| Na | 3.10609968  | -0.35330197 | -0.44988282 |
| Li | -3.76350083 | 0.45539829  | -0.85228072 |
| Li | -0.84332495 | 0.10801142  | -2.42946537 |

### **3d**

|    |             |             |             |
|----|-------------|-------------|-------------|
| Be | 1.47885560  | 1.16144287  | 0.00000000  |
| Be | -0.44233353 | 0.68756630  | 0.00000000  |
| Na | 0.03199281  | 2.65765976  | 1.88294694  |
| Na | 0.87704268  | -3.88185777 | 0.00000000  |
| Na | -1.81284224 | -1.69295498 | 0.00000000  |
| Na | 0.03199281  | 2.65765976  | -1.88294694 |
| Li | 0.88923802  | -0.76418616 | 1.41370098  |
| Li | 0.88923802  | -0.76418616 | -1.41370098 |

### 3e

|    |             |             |             |
|----|-------------|-------------|-------------|
| Be | 1.31421507  | 0.60018476  | -1.38518912 |
| Be | -0.09211059 | 0.32799324  | 0.00478057  |
| Na | 2.18456172  | 1.67503006  | 1.02017597  |
| Na | -1.44379738 | -1.91394775 | 0.83462139  |
| Na | 1.89412353  | -1.81472772 | -0.43200692 |
| Na | -2.83700572 | 1.14422545  | 0.01354148  |
| Li | -0.13618385 | 2.47182773  | -1.23572935 |
| Li | -0.75219002 | -0.37485855 | -2.19027634 |

### 3f

|    |             |             |             |
|----|-------------|-------------|-------------|
| Be | 0.11053788  | 0.98669195  | 0.00000000  |
| Be | -0.11053788 | -0.98669195 | 0.00000000  |
| Na | -1.79743774 | 0.16066642  | 1.80378136  |
| Na | 1.79743774  | -0.16066642 | 1.80378136  |
| Na | 1.79743774  | -0.16066642 | -1.80378136 |
| Na | -1.79743774 | 0.16066642  | -1.80378136 |
| Li | 0.59440022  | 3.34475163  | 0.00000000  |
| Li | -0.59440022 | -3.34475163 | 0.00000000  |

### 3g

|    |             |             |             |
|----|-------------|-------------|-------------|
| Be | 0.64568638  | 0.09766923  | 0.61604296  |
| Be | 1.10017737  | -0.08774739 | -1.32677877 |
| Na | -4.16353396 | 0.47524360  | 0.11482371  |
| Na | -0.84063902 | -1.97348334 | -0.37256005 |
| Na | 3.03668883  | -1.25341515 | 0.42087828  |
| Na | 2.01684117  | 2.31004704  | -0.14052383 |
| Li | -1.05331629 | 1.06318949  | -0.91518464 |

|    |             |            |            |
|----|-------------|------------|------------|
| Li | -1.45547779 | 0.54281017 | 1.77989926 |
|----|-------------|------------|------------|

### 3h

|    |             |             |             |
|----|-------------|-------------|-------------|
| Be | 0.00000000  | 0.00000000  | -1.21077243 |
| Be | 0.00000000  | 0.00000000  | 0.76218616  |
| Na | -1.89590485 | 1.79622423  | -0.31313712 |
| Na | 1.89590485  | -1.79622423 | -0.31313712 |
| Na | 1.89590485  | 1.79622423  | -0.31313712 |
| Na | -1.89590485 | -1.79622423 | -0.31313712 |
| Li | 0.00000000  | 1.56825538  | 2.59542805  |
| Li | 0.00000000  | -1.56825538 | 2.59542805  |

### 3i

|    |             |             |             |
|----|-------------|-------------|-------------|
| Be | -0.54645610 | 5.06575783  | 0.00000000  |
| Be | 0.37506279  | -0.60621028 | 0.00000000  |
| Na | 0.19399167  | 2.03243586  | 0.00000000  |
| Na | -2.20514846 | -1.15678214 | 0.00000000  |
| Na | 0.55875196  | -0.78616521 | 2.60961152  |
| Na | 0.55875196  | -0.78616521 | -2.60961152 |
| Li | 2.70844552  | -0.46530277 | 0.00000000  |
| Li | 0.79476041  | -2.90892013 | 0.00000000  |

### Be<sub>2</sub>Na<sub>6</sub>--(4)

#### 4a

|    |             |             |            |
|----|-------------|-------------|------------|
| Be | -0.98773927 | 0.04977411  | 0.00000000 |
| Be | 0.98773927  | -0.04977411 | 0.00000000 |
| Na | -0.00000000 | 0.00000000  | 2.54774393 |
| Na | -0.10588406 | -2.54478925 | 0.00000000 |

|    |             |             |             |
|----|-------------|-------------|-------------|
| Na | 0.10588406  | 2.54478925  | 0.00000000  |
| Na | -0.00000000 | 0.00000000  | -2.54774393 |
| Na | 3.62219474  | 0.02511650  | 0.00000000  |
| Na | -3.62219474 | -0.02511650 | 0.00000000  |

#### **4b**

|    |             |             |             |
|----|-------------|-------------|-------------|
| Be | -0.00000000 | 0.00000000  | 1.75596471  |
| Be | 0.00000000  | 0.00000000  | -0.22766120 |
| Na | 1.38191065  | 2.21810430  | 0.96080296  |
| Na | -1.38191065 | -2.21810430 | 0.96080296  |
| Na | -2.29768467 | 1.24338865  | 0.96184815  |
| Na | 2.29768467  | -1.24338865 | 0.96184815  |
| Na | 0.48053193  | -1.81663674 | -2.19883788 |
| Na | -0.48053193 | 1.81663674  | -2.19883788 |

#### **4c**

|    |             |             |             |
|----|-------------|-------------|-------------|
| Be | -0.55963085 | -0.89162007 | 0.00000000  |
| Be | 1.36449420  | -1.49683692 | 0.00000000  |
| Na | 0.96650808  | 0.67266204  | 1.74612319  |
| Na | 0.19018177  | 4.06093499  | 0.00000000  |
| Na | -0.22018474 | -2.99001703 | -1.78943680 |
| Na | 0.96650808  | 0.67266204  | -1.74612319 |
| Na | -1.97890403 | 1.43538382  | 0.00000000  |
| Na | -0.22018474 | -2.99001703 | 1.78943680  |

#### **4d**

|    |            |            |             |
|----|------------|------------|-------------|
| Be | 0.00000000 | 0.00000000 | -5.47453595 |
| Be | 0.00000000 | 0.00000000 | 0.28647305  |
| Na | 0.00000000 | 0.00000000 | -2.36623795 |

|    |             |             |            |
|----|-------------|-------------|------------|
| Na | 0.00000000  | 2.64723600  | 0.32664505 |
| Na | 0.00000000  | -2.64723600 | 0.32664505 |
| Na | 2.64723600  | 0.00000000  | 0.32664505 |
| Na | -2.64723600 | -0.00000000 | 0.32664505 |
| Na | 0.00000000  | 0.00000000  | 2.94541205 |

### **Be<sub>2</sub>Na<sub>4</sub>K<sub>2</sub>--(5)**

#### **5a**

|    |             |             |             |
|----|-------------|-------------|-------------|
| Be | 0.00000000  | 0.00000000  | 0.98728200  |
| Be | 0.00000000  | 0.00000000  | -0.98728200 |
| Na | 0.00000000  | 2.57403700  | 0.00000000  |
| Na | 2.57403700  | 0.00000000  | 0.00000000  |
| Na | -2.57403700 | 0.00000000  | 0.00000000  |
| Na | 0.00000000  | -2.57403700 | 0.00000000  |
| K  | 0.00000000  | 0.00000000  | 4.10466800  |
| K  | 0.00000000  | 0.00000000  | -4.10466800 |

#### **5b**

|    |             |             |             |
|----|-------------|-------------|-------------|
| Be | 1.34538860  | -0.47305345 | 0.13415161  |
| Be | -0.58075279 | -0.08590406 | -0.06096712 |
| Na | 0.56264303  | -0.51209517 | -2.51361635 |
| Na | 0.04975074  | -0.29480981 | 2.59077482  |
| Na | 3.93723562  | -1.00601710 | 0.08515801  |
| Na | -0.14791529 | -2.83153922 | 0.10084709  |
| K  | -3.70250441 | 0.09326112  | -0.14478334 |
| K  | 0.99316766  | 2.71331279  | -0.02298177 |

#### **5c**

|    |             |             |             |
|----|-------------|-------------|-------------|
| Be | -0.97506026 | -0.05010186 | 0.36008350  |
| Be | 0.99419721  | 0.05184145  | 0.30916253  |
| Na | 0.15058559  | -1.73828966 | 2.26902914  |
| Na | -3.60507450 | -0.17188349 | 0.60707491  |
| Na | 3.63129609  | 0.17555142  | 0.45754381  |
| Na | -0.02806495 | 1.75277697  | 2.26289136  |
| K  | 0.07957877  | -2.28948494 | -1.68680733 |
| K  | -0.16972153 | 2.27860779  | -1.69418823 |

### 5d

|    |             |             |             |
|----|-------------|-------------|-------------|
| Be | 0.03070464  | -0.96475075 | 0.21484807  |
| Be | -0.03070464 | 0.96475075  | -0.21484807 |
| Na | -0.01096041 | 0.59456196  | 2.49449324  |
| Na | 0.11649140  | -3.60970289 | 0.38879205  |
| Na | 0.01096041  | -0.59456196 | -2.49449324 |
| Na | -0.11649140 | 3.60970289  | -0.38879205 |
| K  | -3.09053315 | -0.08571911 | 0.00326777  |
| K  | 3.09053315  | 0.08571911  | -0.00326777 |

### 5e

|    |             |             |             |
|----|-------------|-------------|-------------|
| Be | -0.10969343 | 0.08178979  | 0.09600017  |
| Be | 0.91691862  | -1.51902196 | 0.71733804  |
| Na | -1.65280803 | -1.91035845 | 1.63662972  |
| Na | 0.83819882  | 0.33455663  | 2.75567022  |
| Na | 0.51067950  | 2.77326425  | 0.06910140  |
| Na | -0.19599745 | -2.08968188 | -1.74034344 |
| K  | 3.19251836  | -0.03752314 | -0.87664031 |
| K  | -3.07302899 | 0.85664643  | -0.86993811 |

## 5f

|    |             |             |             |
|----|-------------|-------------|-------------|
| Be | 1.41333547  | 0.29649360  | -0.00906858 |
| Be | 2.05340387  | -1.62364991 | 0.04897825  |
| Na | -0.09452997 | -1.15359820 | 1.80412919  |
| Na | 3.54477163  | -0.00926359 | 1.78438157  |
| Na | -0.07692347 | -1.24502071 | -1.75652908 |
| Na | 3.55707218  | -0.12053671 | -1.77187227 |
| K  | -3.89050317 | -0.73942232 | 0.01573393  |
| K  | -0.85166797 | 2.48264530  | -0.05893614 |

## 5g

|    |             |             |             |
|----|-------------|-------------|-------------|
| Be | -1.04593712 | -0.24942638 | -0.32183475 |
| Be | -1.90177942 | 0.77107263  | 1.21155776  |
| Na | 3.84851247  | 0.19282387  | 0.75363593  |
| Na | 0.46752708  | -0.50230176 | 2.04894428  |
| Na | -2.83915318 | -1.89027531 | 1.09671322  |
| Na | -3.53176247 | 0.82938415  | -1.06585779 |
| K  | 0.44375480  | 2.58491550  | -0.32655534 |
| K  | 1.36648222  | -1.90136421 | -1.50116487 |

## 5h

|    |             |             |             |
|----|-------------|-------------|-------------|
| Be | 0.67579041  | -1.09889879 | 0.00000000  |
| Be | -1.24465654 | -1.74430138 | 0.00000000  |
| Na | 2.19771703  | 1.14828790  | 0.00000000  |
| Na | 0.44233493  | -3.26669672 | 1.74808952  |
| Na | 0.44233493  | -3.26669672 | -1.74808952 |
| Na | 0.51269088  | 4.11262295  | 0.00000000  |
| K  | -0.98031852 | 0.66793305  | -2.22367256 |

|   |             |            |            |
|---|-------------|------------|------------|
| K | -0.98031852 | 0.66793305 | 2.22367256 |
|---|-------------|------------|------------|

## 5i

|    |             |            |            |
|----|-------------|------------|------------|
| Be | -1.14209297 | 0.86168495 | 1.29168578 |
|----|-------------|------------|------------|

|    |             |            |             |
|----|-------------|------------|-------------|
| Be | -0.60742765 | 0.29359158 | -0.57849600 |
|----|-------------|------------|-------------|

|    |            |             |            |
|----|------------|-------------|------------|
| Na | 0.57945960 | -1.33427448 | 1.44846731 |
|----|------------|-------------|------------|

|    |             |            |             |
|----|-------------|------------|-------------|
| Na | -2.47913025 | 2.38575455 | -0.66288114 |
|----|-------------|------------|-------------|

|    |            |             |             |
|----|------------|-------------|-------------|
| Na | 1.15729883 | -1.28966751 | -1.88058942 |
|----|------------|-------------|-------------|

|    |            |             |            |
|----|------------|-------------|------------|
| Na | 4.00184001 | -1.58389349 | 0.02183907 |
|----|------------|-------------|------------|

|   |            |            |            |
|---|------------|------------|------------|
| K | 1.79316545 | 2.22103033 | 0.30736284 |
|---|------------|------------|------------|

|   |             |             |            |
|---|-------------|-------------|------------|
| K | -3.31190585 | -1.40935747 | 0.16379752 |
|---|-------------|-------------|------------|
